1 **The Structure-Selective Endonucleases GEN1 and MUS81 are Functionally**  
2 **Complementary in Safeguarding the Genome of Proliferating B Lymphocytes**

3

4 Keith Conrad Fernandez<sup>1,2,6</sup>, Laura Feeney<sup>3,6</sup>, Ryan M. Smolkin<sup>1,4</sup>, Wei-Feng Yen<sup>1,5</sup>,  
5 Allysia J. Matthews<sup>1,2</sup>, John H. J. Petrini<sup>3,4,5\*</sup>, Jayanta Chaudhuri<sup>1,2,4\*</sup>

6

7 <sup>1</sup>Immunology Program, Memorial Sloan-Kettering Cancer Center, New York, NY 10065,  
8 USA.

9 <sup>2</sup>Immunology and Microbial Pathogenesis Program, Weill Cornell Graduate School of  
10 Medical Sciences, Cornell University, New York, NY 10065, USA.

11 <sup>3</sup>Molecular Biology Program, Memorial Sloan-Kettering Cancer Center, New York, NY,  
12 10065, USA.

13 <sup>4</sup>Gerstner Sloan Kettering Graduate School of Biomedical Sciences, New York, NY,  
14 10065, USA.

15 <sup>5</sup>Biochemistry, Cellular and Molecular Biology Allied Program, Weill Cornell Graduate  
16 School of Medical Sciences, Cornell University, New York, NY 10065, USA.

17 <sup>6</sup>These authors contributed equally.

18 \*Correspondence: [chaudhuj@mskcc.org](mailto:chaudhuj@mskcc.org); [petrinij@mskcc.org](mailto:petrinij@mskcc.org)

19

20

21 **ABSTRACT**

22 During the development of humoral immunity, activated B lymphocytes undergo vigorous  
23 proliferative, transcriptional, metabolic, and DNA remodeling activities; hence, their  
24 genomes are constantly exposed to an onslaught of genotoxic agents and processes.  
25 Recombination-dependent DNA transactions that preserve the integrity of the genome  
26 and of the DNA replication process generates Holliday junctions that must be eliminated  
27 for the accurate segregation of sister chromatids and faithful propagation of genomic  
28 material. To investigate the role of two Holliday junction resolvases, GEN1 and MUS81,  
29 in B cell biology, we established B-cell conditional knockout mouse models and found  
30 that targeted deletion of GEN1 and MUS81 in early B cell precursors halts their  
31 development and maturation while selective loss of the resolvases in mature B cells  
32 inhibits the generation of robust germinal centers. Upon activation, these double-null  
33 mature B lymphocytes fail to proliferate and survive while exhibiting transcriptional  
34 signatures of p53 signaling, apoptosis, and type I interferon response. Metaphase  
35 spreads of these resolvase-deficient cells showed severe and diverse chromosomal  
36 abnormalities, including a preponderance of chromosome breaks, consistent with a defect  
37 in resolving DNA recombination intermediates. These observations underscore the  
38 essential roles of GEN1 and MUS81 in safeguarding the genome to ensure the proper  
39 development and maintenance of B lymphocytes.

## 40 INTRODUCTION

41 B lymphocytes comprise the humoral arm of the adaptive immune system. They  
42 undergo a well-orchestrated series of clonal expansion and differentiation programs in  
43 the bone marrow to become mature B cells that reside in secondary lymphoid organs  
44 such as the spleen and lymph nodes (LeBien and Tedder, 2008; Pieper et al., 2013).  
45 During an adaptive immune response, B cells are recruited into the germinal center (GC)  
46 where they adopt one of two cellular fates before exiting the GC: memory B cells that  
47 confer immunological memory and plasma cells that produce antibodies of high affinity  
48 and specificity (Victora and Nussenzweig, 2012). B lymphocytes are unique among other  
49 immune cells in that they initiate programmed DSBs both as developing precursors in the  
50 bone marrow and as GC B cells in the secondary lymphoid organs (Alt et al., 2013). V(D)J  
51 recombination generates a primary repertoire of B cell receptors that can be further  
52 diversified when GC B cells employ the DNA-modifying enzyme activation-induced  
53 cytidine deaminase (AID) to instigate the formation of DSBs in the immunoglobulin heavy  
54 loci (IgH) for class-switch recombination (CSR) and to somatically hypermutate the  
55 variable regions of the immunoglobulin loci (Feng et al., 2020; Schatz and Swanson,  
56 2011; Xu et al., 2012). To outcompete other clonal cells and be selected for survival and  
57 differentiation, GC B cells not only are required to express the correct antigen-specific  
58 receptor of high affinity and specificity, but they must also satisfy the formidable  
59 replicative, transcriptional, and metabolic demands for clonal expansion (Young and  
60 Brink, 2021). These cellular activities pose significant collateral genotoxic hazards to GC  
61 B cells and thus, safeguarding the cells' genomic integrity is paramount for the faithful  
62 duplication and propagation of genetic information.

63 Impediments to the progression of the replication fork—termed replication stress—  
64 represent a significant endogenous source of DSBs in proliferating cells, producing up to  
65 50 DSBs per cell cycle in a cell (Mehta and Haber, 2014; Zeman and Cimprich, 2014).  
66 Factors that impair the functionality of the replication machinery include repetitive  
67 sequences, secondary structures (such as R-loops and G-quadruplexes), transcription-  
68 replication conflicts, lesions such as thymidine dimers and single-stranded breaks,  
69 oxidative stress, and imbalance or depletion of the nucleotide pool (Zeman and Cimprich,  
70 2014). To ensure completion of DNA synthesis before mitosis commences, replication

71 forks that have stalled or collapsed can be restarted via recombination-dependent or -  
72 independent pathways, the choice of which is contingent upon the nature of the replication  
73 barrier, the duration of stalling, the nature of the intermediates generated after fork  
74 stalling, and the type of processing these intermediates undergo (Berti et al., 2020;  
75 Petermann and Helleday, 2010; Zeman and Cimprich, 2014). Though primarily studied in  
76 the context of DSB repair, proteins involved in homologous recombination (HR) including  
77 BRCA2 and RAD51 are also critical for the protection, remodeling, and recombination-  
78 dependent restart of replication forks, highlighting the necessity of HR in mitigating  
79 replication stress and assisting timely completion of DNA synthesis (Ait Saada et al.,  
80 2018; Carr and Lambert, 2013; Scully et al., 2021).

81         Recombination-dependent repair of DSBs and restart of replication forks entail  
82 strand invasion and homology search of an intact duplex DNA, culminating in the  
83 formation of Holliday junctions (HJs) that physically link the two sister chromatids (Falquet  
84 and Rass, 2019). Several mechanisms have evolved to process these intermediates, as  
85 failure to eliminate HJs results in the entanglement of sister chromatids that precludes  
86 chromosomal disjunction and propagation of the correct complement of genetic material  
87 (West and Chan, 2017). The BLM-TOP3A-RMI1-RMI2 (BTR) complex dissolves double  
88 HJs to generate non-crossover products while structure-selective endonucleases (SSEs)  
89 such as MUS81 (in complex with EME1, SLX1-SLX4, and XPF-ERCC1) and GEN1  
90 resolve single and double HJs to generate both crossover and non-crossover products,  
91 depending on the position of the nicks introduced (Blanco and Matos, 2015). Because  
92 these SSEs are active against a broad spectrum of branched DNA structures, they are  
93 subjected to multiple cell cycle-dependent regulatory mechanisms so that replication can  
94 proceed without interference and that toxic recombination outcomes due to uncontrolled  
95 HJ resolution are minimized (Wild and Matos, 2016). Although deletion of BLM itself  
96 causes embryonic lethality in mice, individual loss of GEN1 or MUS81 does not confer a  
97 strong DNA repair-deficient phenotype in unperturbed cells, implying some degree of  
98 functional overlap between the two proteins (McDaniel et al., 2003; Sarbajna et al., 2014).  
99 Only when GEN1 and MUS81 are both absent is the genomic integrity of the cells  
100 severely subverted, resulting in compromised viability, gross chromosomal abnormalities,



101 multinucleation, and heightened formation of micronuclei (Chan et al., 2018; Garner et  
102 al., 2013; Sarbajna et al., 2014; Wechsler et al., 2011).

103 Besides removing HR intermediates arising from recombinational DNA  
104 transactions, both SSEs process persistent replication intermediates to promote the  
105 completion of genome replication and sister chromatid disentanglement (Falquet and  
106 Rass, 2019). MUS81 (in complex with EME2) can cleave replication forks, structures  
107 resembling intact HJs such as four-way reversed forks, and D-loops to initiate and  
108 regulate replication fork restart via break-induced replication (BIR) (Hanada et al., 2007;  
109 Kikuchi et al., 2013; Mayle et al., 2015; Pepe and West, 2014a, 2014b). MUS81 is also  
110 essential for the ‘expression’ of common fragile sites (CFS)—sites that are prone to  
111 under-replication during stressed conditions—by cleaving stalled replication forks to  
112 enable POLD3-mediated mitotic DNA synthesis (MiDAS) (Debatisse et al., 2012;  
113 Minocherhomji et al., 2015; Naim et al., 2013; Ying et al., 2013). Generation of DSBs at  
114 stalled replication forks, however, is not a prerequisite for HR-dependent replication  
115 restart as the uncoupling of the DNA strands at collapsed forks generate ssDNA that can  
116 invade and re-initiate DNA synthesis (Lambert et al., 2010). Though GEN1 has been  
117 implicated in maintaining replication fork progression alongside MUS81 and in eliminating  
118 persistent replication intermediates in Dna2 helicase-defective yeast cells to potentially  
119 facilitate MiDAS, its importance in rectifying replication stress and DNA under-replication  
120 remains to be determined (Ölmezer et al., 2016; Sarbajna et al., 2014).

121 The role of GEN1 and MUS81 in replication-challenged *in vitro* settings employing  
122 ionizing irradiation, DNA-damaging agents, and replication inhibitors is well established.  
123 Less is known, however, about the importance of these HJ resolvases in an unperturbed  
124 *in vivo* context. Because B cells face an elevated risk of cell death and oncogenic  
125 transformation due to the high level of replication stress and DSBs inflicted on their  
126 genome by AID-dependent and -independent activities (Alt et al., 2013; Barlow et al.,  
127 2013; Basso and Dalla-Favera, 2015; Macheret and Halazonetis, 2015), we asked  
128 whether B cells require GEN1 and MUS81 to develop, survive, and perform their  
129 immunological functions. By employing different stage-specific Cre strains and a global  
130 *Gen1*-knockout mouse carrying floxed *Mus81* alleles, we report that the loss of *Gen1* and  
131 *Mus81* in early pro-B cells severely impaired B cell development whereas double-null

132 mature B cells failed to form competent GCs at steady-state and after immunization. *Ex*  
133 *vivo* characterization of the double-knockout cells uncovered a proliferation block caused  
134 by G2/M arrest, potent activation of p53 and apoptotic pathways, induction of type I  
135 interferon (IFN) response, and widespread chromosomal aberrations. Our findings  
136 support the notion that the primary function of GEN1 and MUS81 in highly proliferative  
137 somatic cells such as B cells is in eliminating replication-derived HJ intermediates to  
138 ensure proper chromosome segregation and avert mitotic catastrophe.

139

## 140 RESULTS

### 141 GEN1 and MUS81 are critical to normal B cell lymphopoiesis

142 We analyzed a publicly accessible RNA-seq dataset (GSE72018) to ascertain the  
143 expression pattern of *Gen1* and *Mus81* in various developing and mature B cell subsets  
144 (Brazão et al., 2016). Expression of *Gen1* is higher in the proliferating pro-B, pre-B, and  
145 GC B cells than in follicular B, marginal zone B, and peritoneal B1a cells (**Figure 1A**).  
146 Conversely, *Mus81* RNA expression is relatively similar across all B cell subsets  
147 examined except in peritoneal B1a cells (**Figure 1B**). RT-qPCR analysis of primary  
148 splenic naïve B lymphocytes stimulated in culture with lipopolysaccharide (LPS) and  
149 interleukin-4 (IL-4) revealed a 10-fold increase in *Gen1* expression as early as 24 hours  
150 post-activation while the expression of *Mus81* was not altered following activation (**Figure**  
151 **1–figure supplement 1A**). We surmise that *Gen1* expression is more closely associated  
152 with activation and proliferation of cells than is *Mus81* expression.

153 To interrogate the roles of GEN1 and MUS81 in B cell development and function,  
154 we generated *Gen1*<sup>-/-</sup> mice by deleting the XPG nuclease domain encoded in exon 4 of  
155 *Gen1* and subsequently crossed them to *Mus81*<sup>-/-</sup> mice (Dendouga et al., 2005) (**Figure**  
156 **1–figure supplement 1B**). Whereas *Gen1*<sup>-/-</sup> and *Mus81*<sup>-/-</sup> mice were born in the expected  
157 Mendelian frequencies, no live *Gen1*<sup>-/-</sup> *Mus81*<sup>-/-</sup> pups were produced, indicating that  
158 constitutive loss of both GEN1 and MUS81 leads to embryonic lethality (**Figure 1–figure**  
159 **supplement 1C**). To circumvent this issue, we generated and bred mice harboring floxed  
160 *Mus81* alleles (*Mus81*<sup>fl/fl</sup>) to the *Mb1*-Cre strain, wherein Cre recombinase expression is  
161 driven by the *Cd79a* promoter and begins at the pre-pro B cell stage (Fahl et al., 2009;  
162 Hobeika et al., 2006). These mice were mated to *Gen1*<sup>-/-</sup> *Mus81*<sup>fl/fl</sup> mice to produce the

163 conditional knockout *Mb1-Cre: Gen1<sup>-/-</sup> Mus81<sup>fl/fl</sup>*, the single knockouts *Gen1<sup>-/-</sup> Mus81<sup>fl/fl</sup>*  
164 and *Mb1-Cre: Gen1<sup>+/-</sup> Mus81<sup>fl/fl</sup>*, and the control *Gen1<sup>+/-</sup> Mus81<sup>fl/fl</sup>*.

165 Analysis of the spleens of the *Mb1-Cre Gen1<sup>-/-</sup> Mus81<sup>fl/fl</sup>* mice found that the size  
166 of the total splenocyte population was reduced by ninefold compared with control and  
167 single knockout mice (**Figure 1C to E**). The near complete ablation of mature B220+  
168 CD43+ and B220+ CD43- cellular compartments indicated a significantly perturbed  
169 development or maintenance of peripheral B-lineage cells (**Figure 1E**). Examination of  
170 the bone marrow revealed a 75% reduction in cellularity that was caused by the severe  
171 loss of the total B cell population; the T cell numbers remained unaltered (**Figure 1F and**  
172 **G**). Quantification of the B-lineage subpopulations showed that both immature and mature  
173 recirculating B cells were absent (**Figure 1H**), and that the resolvase-deficient B cell  
174 progenitors produced few CD19+ CD43+ BP1- CD24<sup>var</sup> pro-B cells. (**Figure 1I**). The size  
175 of the pre-pro B cell population in these *Mb1-Cre Gen1<sup>-/-</sup> Mus81<sup>fl/fl</sup>* mice, conversely, was  
176 comparable to that of control and single-knockout mice, indicating that *Gen1* and *Mus81*  
177 in pre-pro B cells are necessary for differentiation into pro-B cells, the expansion and  
178 maintenance of pro-B cells, or both.

179

### 180 *Gen1 and Mus81 are required for robust germinal center responses*

181 To circumvent the B cell developmental block in *Mb1-Cre: Gen1<sup>-/-</sup> Mus81<sup>fl/fl</sup>* mice,  
182 we bred the naïve B cell-specific deleter strain, *Cd23-Cre*, with *Gen1<sup>-/-</sup> Mus81<sup>fl/fl</sup>* mice to  
183 generate *Cd23-Cre: Gen1<sup>-/-</sup> Mus81<sup>fl/fl</sup>* (designated henceforth as DKO), *Cd23-Cre:*  
184 *Gen1<sup>+/-</sup> Mus81<sup>fl/fl</sup>* (*Mus81-KO*), *Gen1<sup>-/-</sup> Mus81<sup>fl/fl</sup>* (*Gen1-KO*), *Cd23-Cre: Gen1<sup>+/-</sup> Mus81<sup>fl/+</sup>*  
185 (*Cre control*), and *Gen1<sup>+/-</sup> Mus81<sup>fl/fl</sup>* (*control*) littermates. Though the B cell precursor  
186 subsets in the bone marrow of the DKO mice did not exhibit any major deficiencies in  
187 their frequencies or absolute numbers (**Figure 2–figure supplement 1A to E**), the total  
188 bone marrow cellularity was reduced by 30%, attributed to the 60% decrease in the  
189 number of the mature recirculating B cells (**Figure 2–figure supplement 1C**). In the DKO  
190 spleens, the frequencies and absolute numbers of the various B cell subsets were  
191 comparable to those of control and the *Gen1-KO* and *Mus81-KO* (collectively referred to  
192 as SKO) spleens (**Figure 2–figure supplement 1F to K**). RT-qPCR analysis of splenic  
193 mature DKO B cells activated with LPS+IL-4 confirmed the ablation of *Gen1* and *Mus81*

Figure 1

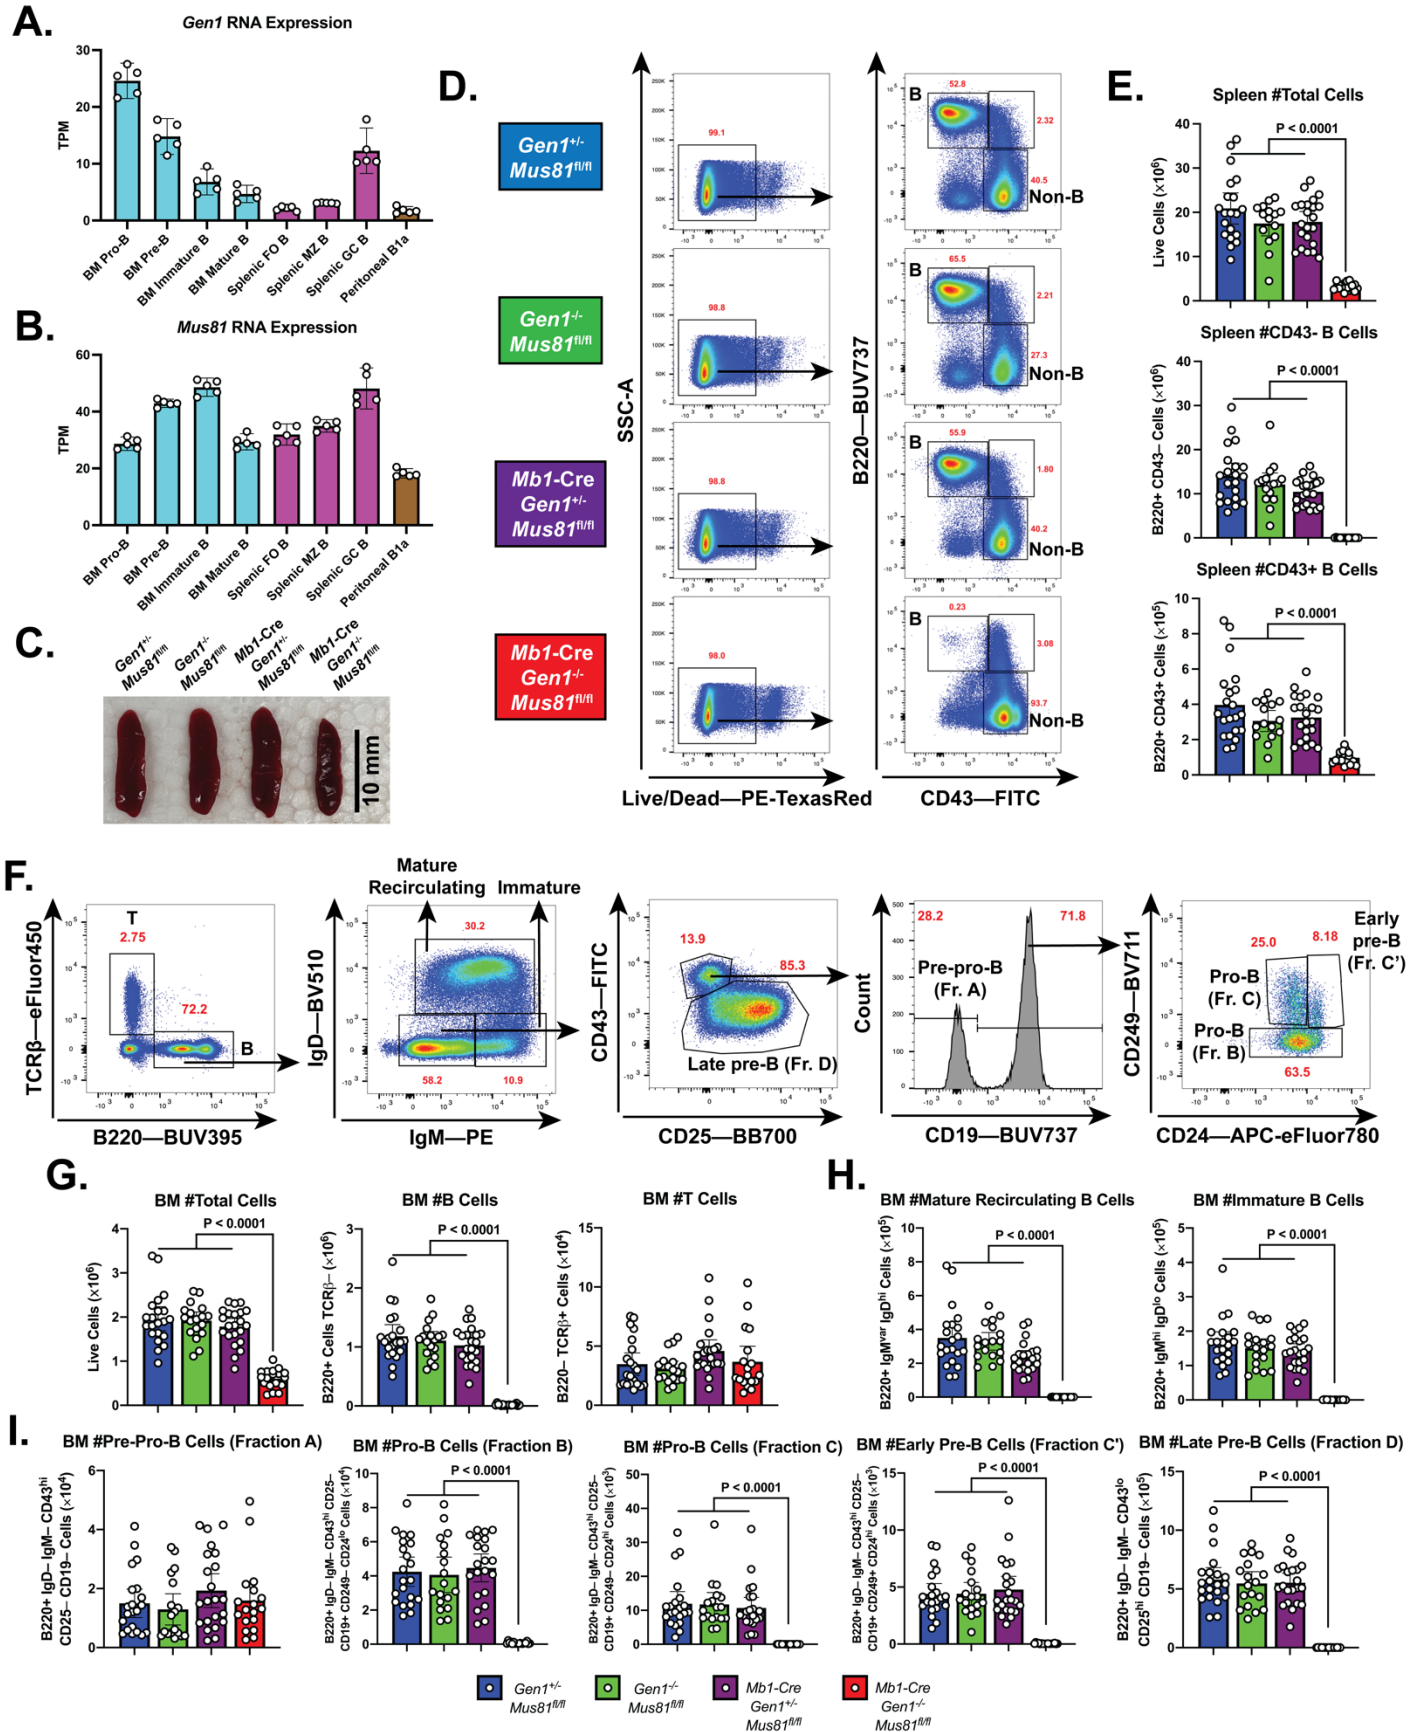

194 **Figure 1. B cell development in the bone marrow and spleen of *Mb1-Cre Gen1<sup>-/-</sup>***  
195 ***Mus81<sup>fl/fl</sup>* mice.** (A and B) mRNA expression of *Gen1* (A) and *Mus81* (B) in developing  
196 and mature B cell subsets in the bone marrow (BM), spleen, and peritoneal cavity. FO:  
197 follicular, MZ: marginal zone (GEO Accession: GSE72018). (C) Spleens harvested from  
198 4-month-old mice of the indicated genotypes. (D and E) Gating strategy (D) and absolute  
199 quantification (E) of live splenocytes, splenic B220+ CD43- B, and B220+ CD43+ B cells.  
200 (F) Gating strategy of total B (B220+ TCRβ-), T (B220- TCRβ+), mature recirculating,  
201 immature, pre-pro B (Fraction A), pro-B (Fractions B and C), early pre-B (Fraction C'),  
202 and late pre-B cells (Fraction D). (G-I) Absolute quantification of BM cellularity, total B,  
203 and total T cell populations (G), of mature recirculating and immature B cell populations  
204 (H), and of B cell populations belonging to fractions A to D (I). Data in (E) and (G)-(I) are  
205 from four independent experiments with 18 to 22 mice per genotype. Bars display the  
206 arithmetic mean and error bars represent the 95% confidence interval of the measured  
207 parameters. P-values were enumerated using ordinary one-way ANOVA analysis with  
208 Dunnett's multiple comparisons test without pairing wherein all means were compared to  
209 the *Mb1-Cre Gen1<sup>-/-</sup> Mus81<sup>fl/fl</sup>* group. TPM, transcripts per million.



210 transcript expression (**Figure 2–figure supplement 1L**). These data show that the  
211 deletion of *Gen1* and *Mus81* in the later stages of the B cell life cycle does not markedly  
212 impact the development and maintenance of homeostatic B cell compartments; thus, the  
213 DKO mice can serve as a genetic tool to investigate the functions of *Gen1* and *Mus81* in  
214 activated, mature B cells.

215 We next characterized the impact of *Gen1* and *Mus81* deletion on the steady-state  
216 GC response in the mesenteric lymph nodes and Peyer’s patches—sites where B cells  
217 continuously encounter and are activated by microbial and food antigens (**Figure 2A**).  
218 We found that the frequency and absolute number of GC B cells were decreased by 1.5  
219 to 2-fold in DKO mice compared with control and SKO mice (**Figure 2B and C**). To assess  
220 the importance of GEN1 and MUS81 in supporting the formation and integrity of induced  
221 GCs, we immunized mice with sheep red blood cells (SRBCs) to elicit a T cell-dependent  
222 GC response. Mice were boosted 10 days after the initial dose and the GCs in the spleen  
223 were analyzed at day 14 (**Figure 2D**). Only in the DKO mice was GC formation abrogated:  
224 the size of the GCs was only 5% of that in control and SKO mice (**Figure 2E**). Such  
225 disruption in GC formation was also observed when DKO mice were challenged with  
226 another T-cell dependent antigen, NP-CGG (**Figure 2G**). Despite the compromised GC  
227 response, the frequencies and absolute numbers of total B220+ CD19+ B cells in both  
228 immunization settings were comparable in the DKO, SKO, and control littermates (**Figure**  
229 **2F and H**). These experiments indicate that although *Gen1-Mus81*-null naïve B cells can  
230 persist in the periphery, they are unable to mount a productive GC reaction upon antigenic  
231 exposure at the barrier sites and in secondary lymphoid organs.

232

### 233 GEN1 and MUS81 are necessary for B cell proliferation and survival

234 To mechanistically investigate the causes underlying the abrogated GC response  
235 in the DKO mice, we leveraged a tractable *ex vivo* culture system wherein purified splenic  
236 naïve B cells are induced to proliferate upon stimulation with various cocktails of mitogens  
237 and cytokines. The growth of splenic B cell cultures stimulated with LPS alone, LPS+IL-  
238 4 (LI), or LPS+TGF- $\beta$ +anti-IgD dextran (LTD) was monitored by enumerating the live cells  
239 in culture using flow cytometry. Across all stimulation conditions, the DKO B cells were  
240 unable to expand—after 96 hours of culture, the number of live DKO cells was only 10%

Figure 2

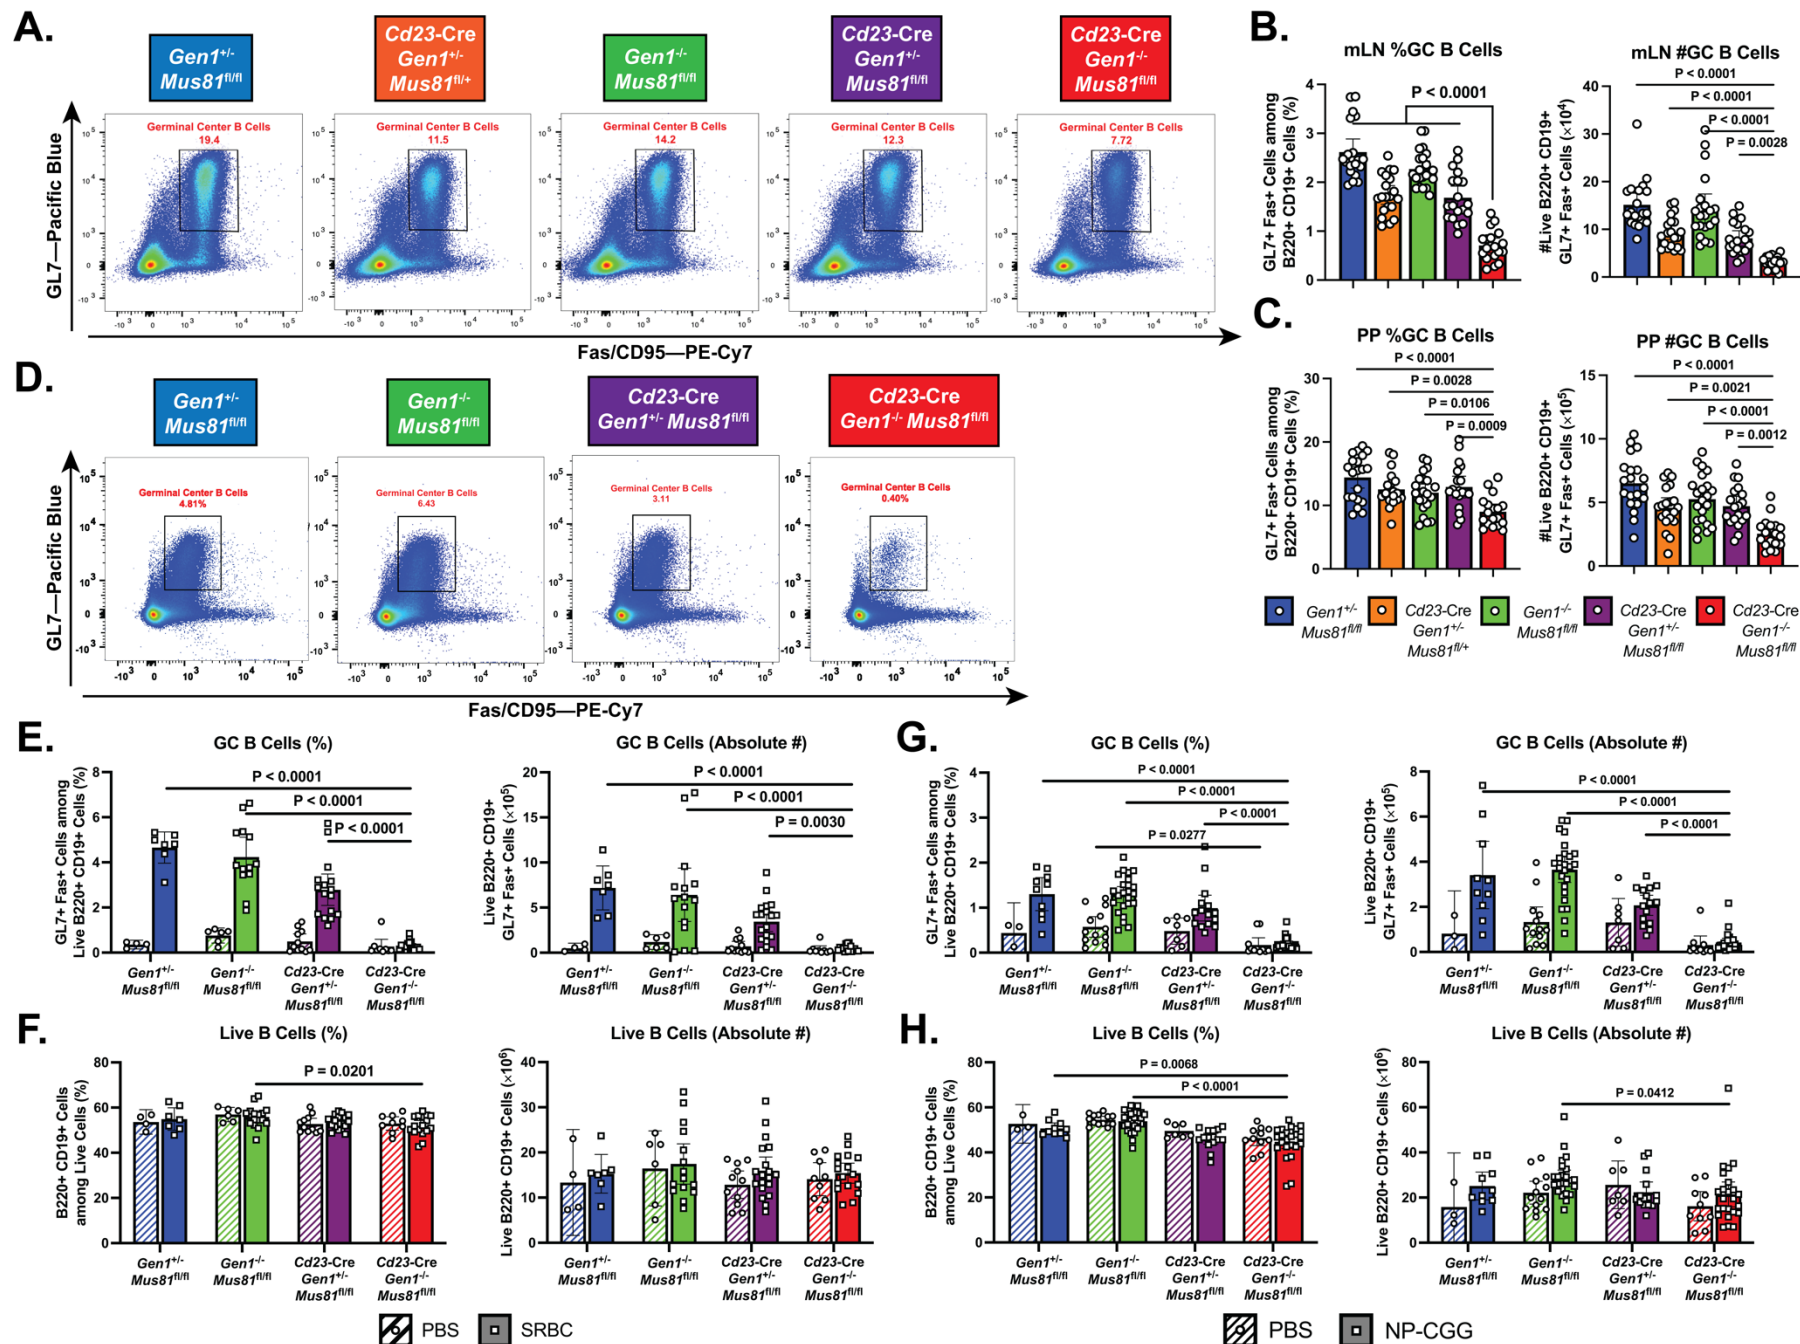

241 **Figure 2. Homeostatic and induced GC responses in *Cd23-Cre Gen1<sup>-/-</sup> Mus81<sup>fl/fl</sup>***  
242 **mice.** (A–C) Homeostatic GC response in mesenteric lymph nodes and Peyer’s patches.  
243 (A) Flow cytometric plots depicting the GL7+ Fas+ GC B cells in the Peyer’s patches of  
244 mice for each indicated genotype. (B and C) Quantification of the frequencies and  
245 absolute numbers of the GL7+ Fas+ GC B cell population in the mesenteric lymph node  
246 (B) and Peyer’s patches (C). (D–F) Evaluation of GC response during SRBC challenge.  
247 (D) Representative plots displaying the GL7+ Fas+ GC B cell population in the spleen of  
248 mice for each indicated genotype. (E and F) Quantification of the frequencies and  
249 absolute numbers of total B cells (E) and GC B cells (F) in the spleen of SRBC-immunized  
250 mice. (G and H) Assessment of induced GC response upon NP-CGG challenge in the  
251 *Cd23-Cre Gen1<sup>-/-</sup> Mus81<sup>fl/fl</sup>* mouse model at day 21 post-immunization. (G) Live cell  
252 frequencies and absolute numbers of live B220+ B cells in the spleen of PBS-treated and  
253 NP-CGG-immunized mice. (H) Quantification of the percentage and absolute count of  
254 GL7+ Fas+ GC B cells in the spleen. Data in (B) and (C) are from four independent  
255 experiments with 11 to 21 mice per genotype. Data in (D)–(F) are from three independent  
256 experiments with 4 to 9 mice per genotype for the PBS group and 7 to 20 mice per  
257 genotype for the SRBC group. Data in (G)–(H) are from three independent experiments  
258 with 5 to 13 per genotype in the PBS group and with 10 to 25 mice in the NP-CGG group.  
259 Bars represent the arithmetic mean and the error bars depict the 95% confidence interval  
260 of the measured parameters. For (A)–(C), P-values were computed by ordinary one-way  
261 ANOVA analysis with Dunnett’s multiple comparisons test without pairing in which the  
262 means were compared to the *Cd23-Cre Gen1<sup>-/-</sup> Mus81<sup>fl/fl</sup>* group. For (D)–(H), ordinary  
263 two-way ANOVA analysis with Dunnett’s multiple comparisons test without pairing was  
264 used to calculate the P-values. All means were compared within each treatment group to  
265 the *Cd23-Cre Gen1<sup>-/-</sup> Mus81<sup>fl/fl</sup>* cohort.



266 of that of control and SKO B cells (**Figure 3A and Figure 3–figure supplement 1A**). We  
267 then examined the proliferation dynamics of DKO B cells by labeling the cells with  
268 CellTrace™ Violet and tracking the dilution of the dye over time. We noted that at 72  
269 hours post-LI and LPS simulations, between 10% and 15% of the live DKO cells remain  
270 undivided, indicating that a subset of DKO cells was incapable of proliferating (**Figure 3B**  
271 **and Figure 3–figure supplement 1B**). Moreover, only between 51% (LTD culture) and  
272 68% (LPS culture) of the DKO cells that had proliferated underwent at least 3 rounds of  
273 cell division, in contrast to between 72% (LTD culture) and 86% (LPS culture) of the  
274 corresponding control and SKO populations (**Figure 3C and Figure 3–figure**  
275 **supplement 1B**).

276 To gain further insight into the proliferation defect sustained by the activated DKO  
277 cells, we analyzed the cell cycle profile of these cells. Cultured B cells were pulse labeled  
278 with the nucleoside analog EdU to mark cells in S phase and stained with DAPI to quantify  
279 DNA content; the proportion of cells in G0/G1, S, and G2/M phases was determined by  
280 flow cytometry (**Figure 3D**). As early as 48 hours post-stimulation, the DKO cultures were  
281 enriched for cells in G2/M phase and depleted for cells in S phase (**Figure 3E**). This  
282 skewed cell cycle distribution of the DKO cells persisted up till 96 hours post-activation  
283 and was observed in all culture conditions (**Figure 3–figure supplement 1C and D**).  
284 Additionally, in the LTD culture, the fraction of DKO cells in the G0/G1 stage was reduced  
285 across all the time points examined (**Figure 3–figure supplement 1D**). Altogether, these  
286 results suggest that the dual loss of GEN1 and MUS81 causes the cells to stall in G2/M,  
287 impeding the completion of the cell cycle.

288 Aside from the proliferation deficiency, we also observed a 2 to 3-fold higher  
289 proportion of dead cells in the DKO cultures relative to that in control and SKO cultures  
290 (**Figure 3F and Figure 3–figure supplement 2A**). To ascertain whether elevated  
291 apoptosis contributed to the perturbed expansion of DKO B cell cultures, we quantified  
292 by flow cytometry the frequency of cells that stained for anti-cleaved caspase-3 antibody.  
293 As early as 48 hours post-stimulation, the proportion of caspase-3+ cells was 2- to 5-fold  
294 higher in DKO cultures compared with control and SKO cultures. The size of the caspase-  
295 3+ population peaked at 72 hours post-stimulation before declining (LI and LTD cultures)  
296 or remaining unchanged (LPS culture) by 96 hours post-stimulation (**Figure 3G and**

Figure 3

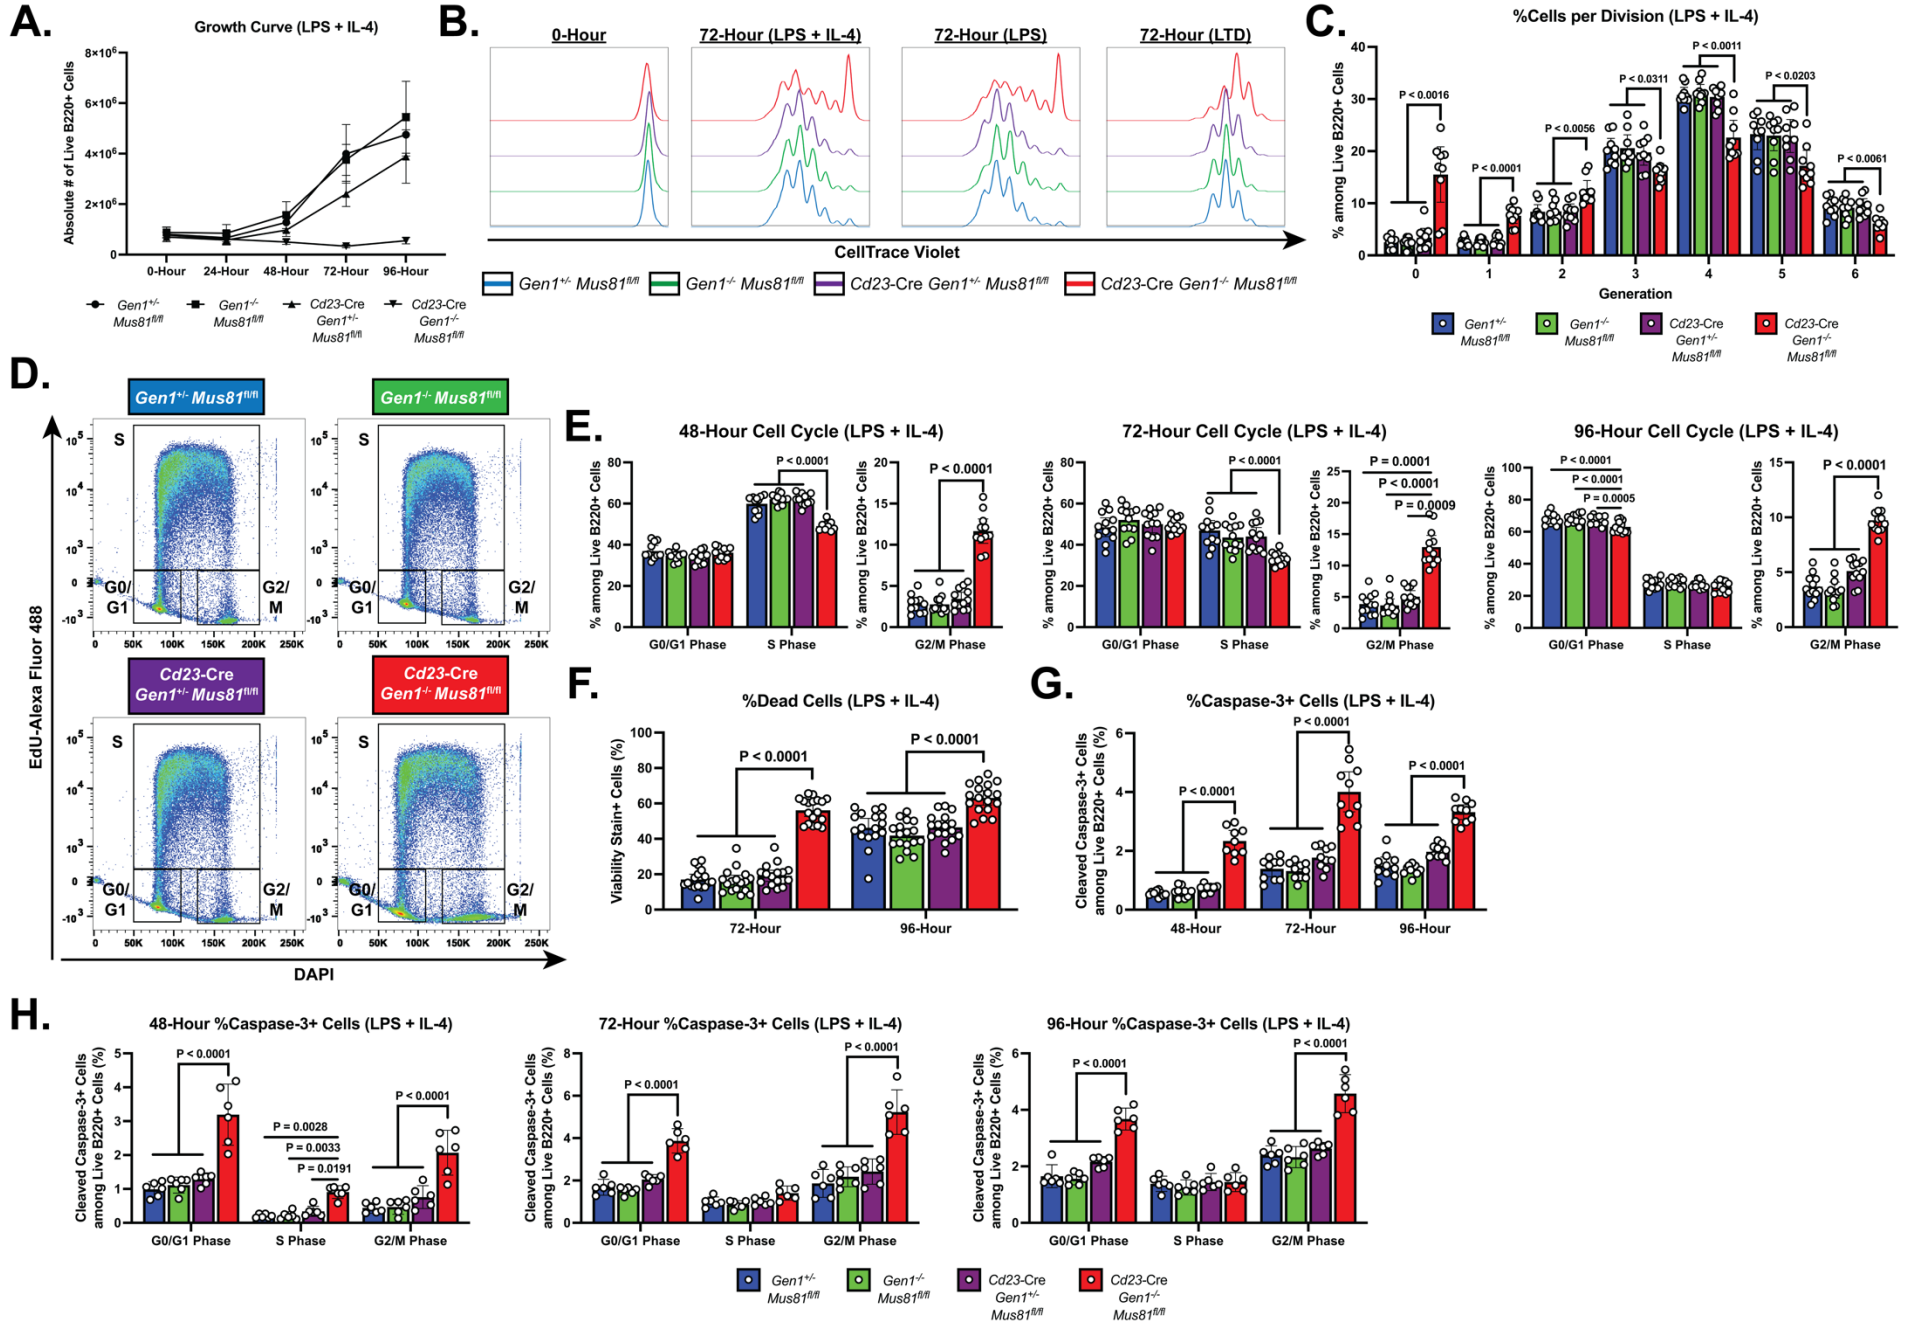

297 **Figure 3. Growth, proliferation, cell cycle, and cell death profiles of ex vivo-**  
298 **stimulated DKO B lymphocytes.** (A) Growth curve of LPS+IL-4 (LI)-activated B cell  
299 culture. (B) Representative CTV dilution profiles of *ex vivo*-activated B cells at 0 hour and  
300 72 hours post-stimulation for all indicated genotypes and culture conditions. (C)  
301 Frequency of live B220+ cells in each division. (D) Representative flow cytometry plots  
302 delineating the cell cycle stages of the cultured B cells based on EdU positivity and  
303 nuclear DNA content as determined by the intensity of DAPI staining. (E) Frequency of  
304 live B cells in G0/G1, S, and G2/M phases. (F) Fraction of dead cells among B220+  
305 singlets at 72 and 96 hours after LPS+IL-4 activation. (G) Percentage of caspase-3+ cells  
306 among live cells at 48, 72, and 96 hours post-stimulation. (H) Frequency of cleaved  
307 caspase-3+ cells among live B220+ cells in G0/G1, S, and G2/M phases after 48, 72, and  
308 96 hours of culture. Data in (A) are from four independent experiments with 9 mice per  
309 genotype. Data in (B) and (C) are representative of four independent experiments with 7  
310 to 9 mice per genotype. Data in (D) and (E) are from six independent experiments with  
311 11 to 12 mice per genotype. Data in (F) are from seven experiments with 17 mice per  
312 genotype. Data in (G) are from five independent experiments with 9 to 10 mice per  
313 genotype. Data in (H) are from three independent experiments with 6 mice per genotype.  
314 Bars display the arithmetic mean and error bars represent the 95% confidence interval of  
315 the measured parameters. P-values were determined using ordinary two-way ANOVA  
316 analysis with Dunnett's multiple comparisons test without pairing wherein the mean of the  
317 *Cd23-Cre Gen1<sup>-/-</sup> Mus81<sup>fl/fl</sup>* group was compared to the rest.

318 **Figure 3–figure supplement 2B**). When we quantified the fraction of caspase-3+ cells  
319 in the different cell cycle phases, we found that across all the time points and stimulation  
320 conditions examined, DKO cells in G2/M and G0/G1 phases experienced a 2- to 5-fold  
321 higher level of apoptosis than their control and SKO counterparts (**Figure 3H and Figure**  
322 **3–figure supplement 2C and D**). Taken together, these observations underscore an  
323 indispensable role for GEN1 and MUS81 in supporting the proliferative capacity and  
324 viability of activated B lymphocytes.

325

### 326 Ablation of GEN1 and MUS81 induces p53 and type I interferon transcriptional programs

327 To assess the genome-wide transcriptional alterations underlying the proliferation  
328 and survival defects of *ex vivo*-activated DKO B cells, we conducted RNA-sequencing  
329 (RNA-seq) on activated B cells harvested at 48 hours post-stimulation, the time point at  
330 which the DKO cells were viable while displaying early signs of cell cycle perturbation and  
331 apoptosis. The RNA-seq analysis showed that the activated control and *Gen1*-KO B  
332 lymphocytes resemble each other transcriptomically, consistent with the lack of overt  
333 perturbations in *Gen1*-KO B cells (**Figure 4–figure supplement 1A**). Differential gene  
334 expression (DGE) analysis comparing *Mus81*-KO to control cells, however, identified 8  
335 genes with a minimum of 2-fold upregulation in *Mus81*-KO cells (**Figure 4–figure**  
336 **supplement 1B**). The induction of only a few genes in *Mus81*-KO cells could be explained  
337 by the mild proliferation and survival perturbations that we had observed in our *in vivo*  
338 and *ex vivo* experiments. Between *Gen1*-KO and *Mus81*-KO cells, the transcript level of  
339 only 4 genes, including *Mus81* were differentially altered (**Figure 4–figure supplement**  
340 **1C**). These findings collectively illustrate that the deletion of either *Gen1* or *Mus81* alone  
341 does not substantially alter the transcriptional landscape of activated B lymphocytes.

342 DGE analysis of control versus DKO cells, on the contrary, revealed that 279  
343 genes were upregulated by at least twofold ( $\log_2$  fold change  $\geq 1$ ; FDR  $< 0.05$ ) and 167  
344 genes were downregulated by a minimum of  $\log_2$  fold change of  $-0.3$  in the DKO B cells  
345 (corresponding to a  $\geq 19\%$  de-enrichment relative to control cells) (**Figure 4A**). To identify  
346 the functional modules to which the differentially expressed genes in the DKO cells  
347 belong, we performed gene set enrichment analysis (GSEA) with the Hallmark Gene Sets  
348 from the Molecular Signatures Database (MSigDB) (Liberzon et al., 2015). We identified

Figure 4

A.

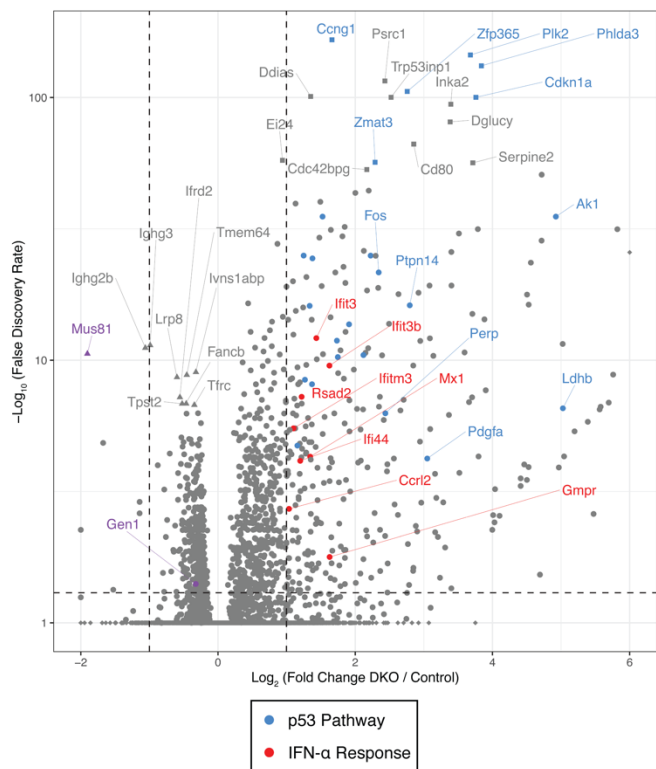

B.

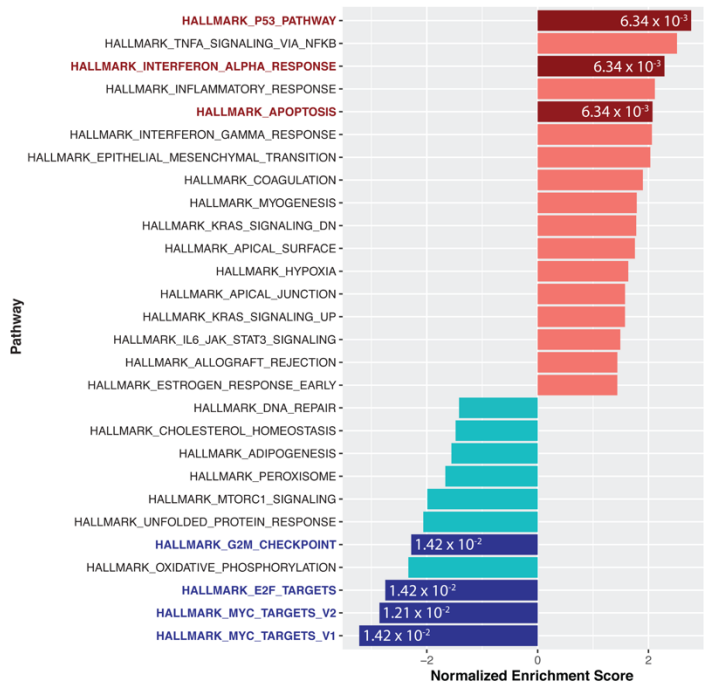

C.

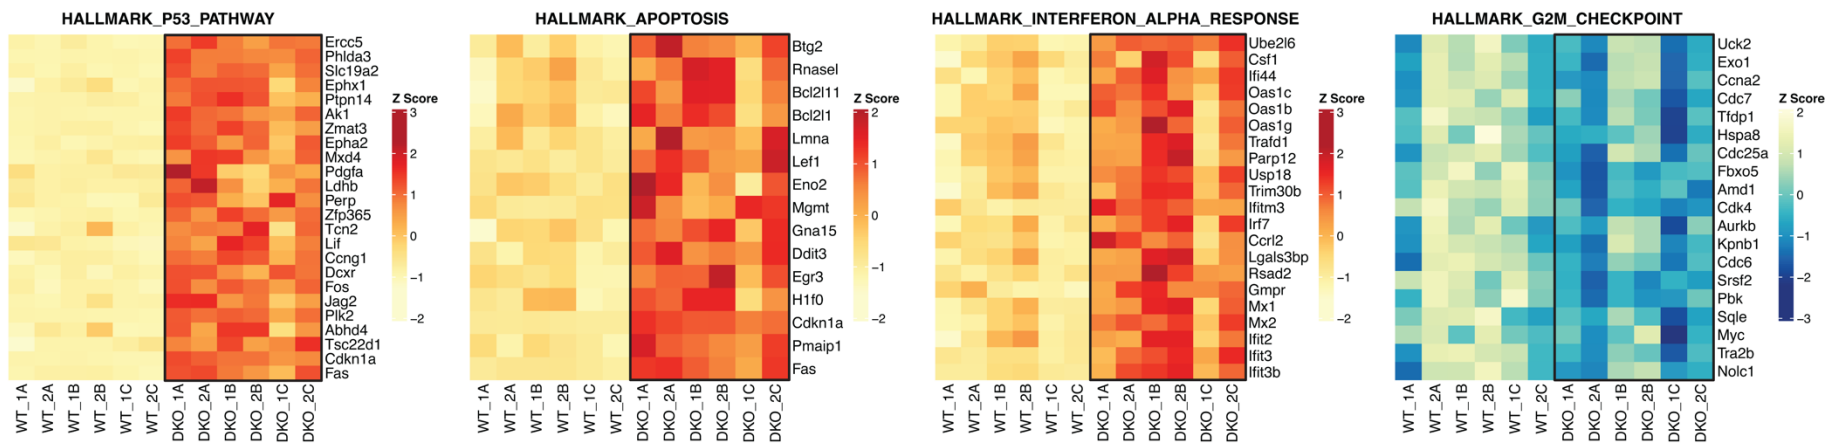

349 **Figure 4. RNA-seq and GSEA analyses of activated control and DKO B cells.** (A)  
350 Volcano plot depicting the differential gene expression between control and DKO cells.  
351 Labeled squares indicate the top 15 most significantly upregulated genes and the labeled  
352 triangles are the 10 most downregulated genes in DKO cells. Using the Hallmark Gene  
353 Sets as a reference, genes labeled in blue are categorized as genes in the p53 pathway  
354 while those labeled in red are defined as interferon alpha (IFN- $\alpha$ ) response genes. Purple  
355 triangles mark *Gen1* and *Mus81*. (B) Graph depicting the list of Hallmark Gene Sets that  
356 are differentially expressed between control and DKO cells (FDR < 0.05). Value in each  
357 bar denotes the FDR for that gene set. (C) Heatmaps displaying the relative expression  
358 of genes within the indicated Hallmark Gene Sets that meet the expression cutoff ( $\log_2$   
359 fold change >1 for p53 pathway; >0.5 for apoptosis and interferon alpha response; <-0.3  
360 for G2/M checkpoint; with FDR < 0.05). Data are from 6 mice per genotype. The labels  
361 '1' and '2' represent male and female mice, respectively, and 'A' to 'C' indicate the three  
362 experimental *ex vivo* groups.



363 the p53 pathway (25/200 genes with  $\log_2$  fold change  $\geq 1$ ; e.g., *Ccng1*, *Zfp365*, *Plk2*,  
364 *Phlda3*, *Cdkn1a*, *Zmat3*) and apoptosis (15/161 genes with  $\log_2$  fold change  $\geq 0.5$ )  
365 signatures among the top 5 enriched gene sets whereas gene sets containing genes  
366 targeted by *Myc* and E2F transcription factors and genes involved in progression through  
367 the G2/M checkpoint were among the most de-enriched in the DKO cells (**Figure 4B and**  
368 **C and Figure 4–figure supplement 1D to F**), concurring with our findings that DKO  
369 cultures exhibit perturbed cell cycle progression, G2/M arrest, proliferation irregularities,  
370 and heightened apoptosis. We also noted that the *ex vivo*-activated DKO B cells  
371 displayed a robust type I IFN gene signature, as exemplified by the high enrichment score  
372 (NES = 2.35; FDR =  $6.34 \times 10^{-3}$ ) and the induction ( $\log_2$  fold change  $\geq 0.5$ ) of 21/97 genes  
373 in the gene set (e.g., *Ifit3*, *Ifit3b*, *Ifitm3*, *Mx1*, *Rsad2*) (**Figure 4C**). We posit from this  
374 analysis that the deficiency of both GEN1 and MUS81 in cells activates p53-dependent  
375 pathways to arrest cell cycle for the repair of genomic insults sustained during cellular  
376 growth and proliferation, and to initiate apoptosis when such DNA lesions are beyond  
377 tolerance and repair.

378

#### 379 GEN1 and MUS81 maintain the genome stability of activated B lymphocytes

380 GEN1 and MUS81 resolve structural intermediates of HR to prevent genome  
381 destabilization caused by the toxic accumulation of erroneously processed recombination  
382 structures (Chan et al., 2018; Sarbajna et al., 2014). Reasoning that the genomic integrity  
383 of proliferating DKO B cells might similarly be compromised, we prepared metaphase  
384 spreads from *ex vivo*-stimulated B cells for evaluation of chromosomal integrity. DKO B  
385 cells displayed approximately 6 times as many abnormalities per metaphase as control  
386 and SKOs B cells (**Figure 5A and B**). Furthermore, whereas almost 95% of control and  
387 SKO metaphases had no more than 2 aberrations, 45% of DKO metaphases showed 3  
388 or more chromosomal defects (**Figure 5C**). All forms of aberrations including breaks, DNA  
389 fragments, fusions, and radials were detected at an elevated rate in DKO B cells  
390 compared with control and SKOs cells (**Figure 5D**). Notably, almost 70% of the breaks  
391 observed were chromosome-type breaks that occur at the same position on both sister  
392 chromatids (**Figure 5E**). To better understand the nature and origins of the chromosomal  
393 irregularities occurring in the activated DKO B cells, we performed telomere fluorescence

Figure 5

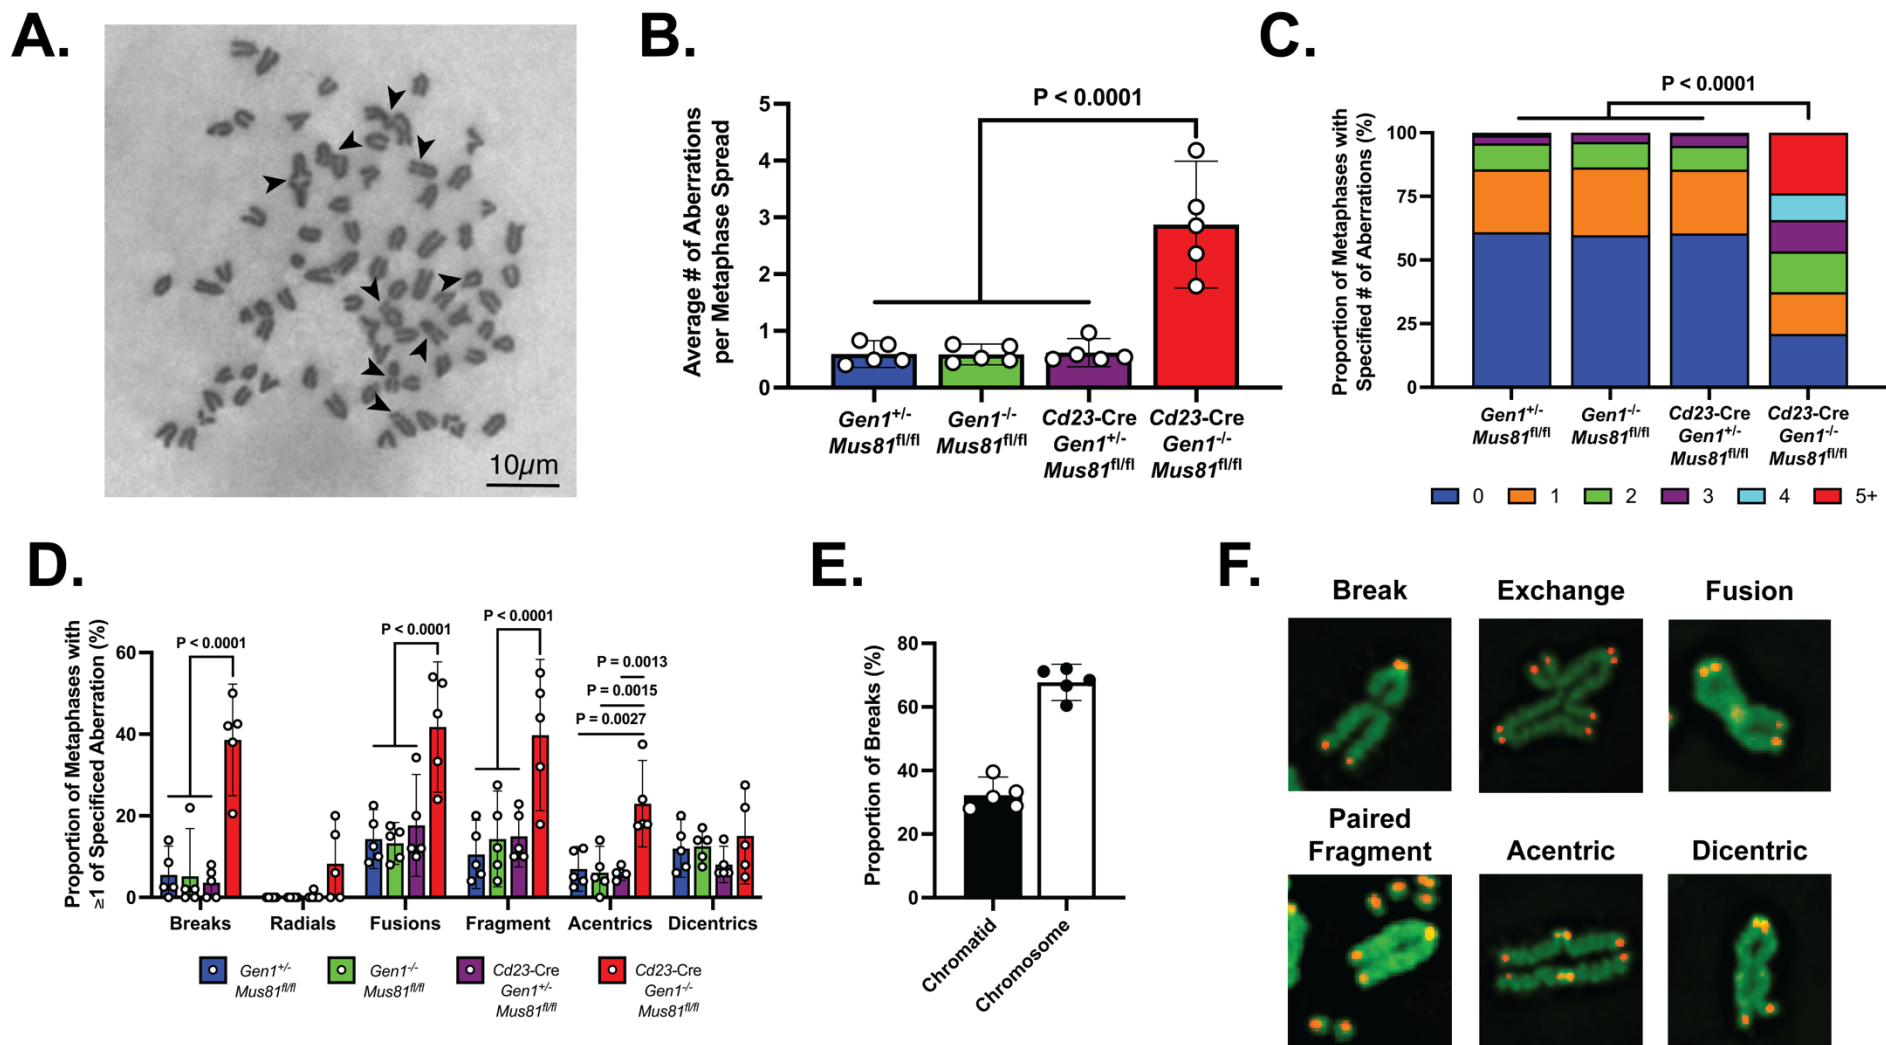



394 **Figure 5. Metaphase chromosomal analysis of activated DKO B cells.** (A)  
395 Representative image of a DKO metaphase spread with arrows indicating chromosomal  
396 breaks, fragments, and fusions in metaphases of activated DKO B cells. (B) Quantification  
397 of the average number of chromosomal aberrations across 45 to 50 metaphase spreads  
398 prepared from each B cell culture. (C) Percentage breakdown of metaphases exhibiting  
399 0 to greater than 5 chromosomal aberrations. (D) Fraction of metaphases containing the  
400 different types of chromosomal abnormalities. Total percentage per genotype exceeds  
401 100% as some metaphases exhibit more than one type of abnormality. (E) Proportion of  
402 chromatid and chromosome breaks among the 163 breaks observed in DKO metaphase  
403 spreads exhibiting at least one break. (F) Immunofluorescence images of Tel-FISH of  
404 metaphases of DKO B cells highlighting the proximal location of the chromosomal  
405 damage to the telomeres. Data in (A–D) are from three independent experiments with 5  
406 mice (totaling between 215 and 235 metaphase spreads) per genotype. For (C) and (D),  
407 the percentage values are the average of the data combined from all 5 mice. Bars display  
408 the arithmetic mean and error bars represent the 95% confidence interval of the  
409 measured parameters. P-values were computed with ordinary one-way ANOVA analysis  
410 (B and D) and with the Kruskal-Wallis test (C) with Dunnett’s multiple comparisons test  
411 without pairing. Means of all groups were compared to that of *Cd23-Cre Gen1<sup>-/-</sup> Mus81<sup>fl/fl</sup>*.

412 in situ hybridization (Tel-FISH). In DKO cells, the breakage occurred proximal to the  
413 telomeres, resulting in paired DNA fragments containing telomeric DNA (**Figure 5F**).  
414 Such symmetrical breakage has been proposed to arise from unresolved recombination  
415 intermediates (Garner et al., 2013). These data argue that GEN1 and MUS81 eliminate  
416 complex recombination intermediates in a timely fashion to preserve the chromosomal  
417 integrity of proliferating B lymphocytes.

418

## 419 **DISCUSSION**

420 HR constitutes one of the two major pathways cells utilize to repair DSBs. This  
421 mode of repair is largely restricted to late S and G2 phases as it requires the sister  
422 chromatid as a template to restore the fidelity of the damaged DNA strand (Heyer, 2015).  
423 HJ intermediates generated in this process are dissolved by the BTR complex and  
424 resolved by GEN1 and the SLX1-SLX4-MUS81-EME1 complex (West et al., 2016).  
425 Failure to eliminate HJs prohibits chromosomal segregation during mitosis, interfering  
426 with the faithful transmission of genetic material to daughter cells while yielding aberrant  
427 mitotic structures including bulky chromatin bridges and ultrafine anaphase bridges  
428 (UFBs) that threaten chromosomal integrity and genomic stability (Chan and West, 2018;  
429 Sarlós et al., 2017; West et al., 2016). B cells encounter a diverse array of genotoxic  
430 stresses throughout their life cycle, of which DSBs—both spontaneously and deliberately  
431 generated—are considered among the most deleterious lesions to the cells' genome. As  
432 such, B cells serve as an informative physiological platform to interrogate the DNA  
433 transactions influencing genome integrity.

434 We established a *Gen1*<sup>-/-</sup> mouse model possessing *Mus81*<sup>fl/fl</sup> alleles to examine  
435 the roles of the HJ resolvases GEN1 and MUS81 at various stages of B cell development.  
436 Inactivation of both resolvases in early B cell precursors abolished the production of  
437 mature B cells in the bone marrow and periphery, whereas ablation in naïve mature B  
438 cells impaired germinal center formation. *Ex vivo* cellular and transcriptomics analyses  
439 reveal that these resolvase-deficient B cells exhibited significant proliferation and viability  
440 perturbations underpinned by widespread chromosomal abnormalities and activation of  
441 p53-dependent cell cycle arrest and apoptosis.

442           The severe attrition of pro-B cells in the *Mb1-Cre Gen1<sup>-/-</sup> Mus81<sup>fl/fl</sup>* mice could be  
443 caused by a developmental arrest during the transition from pre-pro B cell to pro-B cell  
444 stage, by proliferation and survival defects of the pro-B cells, or both. Pro-B cells,  
445 compared to the mitotically inactive pre-pro B cells, undergo IL-7R-dependent expansion  
446 prior to V(D)J recombination and so are more likely to suffer from intense replication  
447 stress that could necessitate commensurate effort of replication restart (Hardy et al.,  
448 1991; Peschon et al., 1994). As resolvase-knockout pro-B cells are unable to resolve HJ  
449 intermediates that arise from such restart activities, they would fail to thrive and proliferate  
450 further. Similarly, the lack of robust chronic and induced GC responses in the *Cd23-Cre*  
451 *Gen1<sup>-/-</sup> Mus81<sup>fl/fl</sup>* mice can be ascribed to the inability of activated DKO cells to undergo  
452 sustained proliferation due to the combination of a profound block at the G2/M transition  
453 and p53-activated apoptosis, as shown by our cell cycle and RNA-seq analyses. DKO  
454 cells not only have a lower propensity to initiate proliferative bursts, but are also incapable  
455 of executing as many divisions as resolvase-sufficient B cells when activated. We did not  
456 observe a time-dependent G2/M accumulation in the DKO culture, suggesting that the  
457 arrested DKO cells could not tolerate for long periods the high level of DNA damage  
458 sustained and consequently undergo mitotic catastrophe, evidenced in the comparatively  
459 higher rate of apoptosis among G2/M cells. The inability of the BTR complex to  
460 compensate for the absence of GEN1 and MUS81 and maintain the viability of  
461 proliferating DKO B cells thus suggests that DNA replication generates persistent double  
462 HJs and multiple BTR-refractory HJ species such as single HJs and nicked HJs that must  
463 be processed and eliminated by these resolvases to suppress genomic instability and  
464 catastrophic mitosis (García-Luis and Machín, 2014). Resting mature DKO cells,  
465 however, persisted unscathed in the spleen, as exemplified by the normal frequencies  
466 and numbers of splenic B cell subpopulations in the *Cd23-Cre Gen1<sup>-/-</sup> Mus81<sup>fl/fl</sup>* mice.  
467 Splenic naïve B cells do not self-renew; instead, they are constantly replenished from  
468 immature precursors produced in the bone marrow (Hao and Rajewsky, 2001). Hence,  
469 resting mature B cells are spared from replication-derived genotoxicity, rendering GEN1  
470 and MUS81 dispensable in these cells.

471           Our observation of extensive chromosomal aberrations in the genetic resolvase-  
472 null mouse B cells concur with that in Sarbajna et al. (2014) employing siRNA depletion

473 of *Gen1* and *Mus81* in cells treated with replication inhibitors. Recombination  
474 intermediates generated in S phase that fail to be resolved in the absence of GEN1 and  
475 MUS81 evade the checkpoint response and persist into mitosis, generating homologous  
476 recombination ultrafine bridges (HR-UFBs) (Chan et al., 2018; Mohebi et al., 2015; Tiwari  
477 et al., 2018). Breakage of the HR-UFBs during cytokinesis activates the DNA damage  
478 checkpoint in the next cell cycle, triggering non-homologous end joining-mediated fusion  
479 of DNA ends that leads to widespread chromosomal rearrangements (Chan et al., 2018).  
480 The preponderance of chromosome breaks that appear to occur at identical sites on sister  
481 chromatids suggests that the aberrations result from defective resolution of inter-  
482 chromatid recombination intermediates (Kikuchi et al., 2013; Shimizu et al., 2020;  
483 Wechsler et al., 2011). This phenotype is distinct from that of irradiated HR-defective  
484 mutants in which chromatid breaks predominate (Fujita et al., 2013; Shimizu et al., 2020).  
485 We cannot completely exclude the role of MUS81—and potentially GEN1—in initiating  
486 BIR and MiDAS at CFS and other under-replicated regions where their absence leads to  
487 the formation of FANCD2-flanking fragile site-UFBs (FS-UFBs) between the segregating  
488 chromatids (Naim et al., 2013; Ying et al., 2013). However, the frequent occurrence of  
489 breaks at corresponding locations on paired sister chromatids argues for a failure of DKO  
490 B cells to resolve HR intermediates. Visualization of UFBs in these cells may be helpful  
491 in defining the molecular origins of these unique aberrations. Detailed investigations to  
492 ascertain whether HR-UFBs derive predominantly from genomic loci where stalled  
493 replication forks are preferentially restarted through recombination-dependent  
494 mechanisms could provide mechanistic insights into the genomic instability of resolvase-  
495 null B cells and clarify the manner by which GEN1 and MUS81 resolve replication stress—  
496 do they cleave persistent and late-occurring replication intermediates such as reversed  
497 forks or do they process HR intermediates (e.g., HJs) arising from recombination-  
498 mediated restart of perturbed forks? Further studies to determine whether the loci where  
499 HR-UFBs manifest encompass early replication fragile sites (ERFS) should be pursued  
500 given that such sites have recently been identified as hotspots for transcription-replication  
501 conflicts and breakpoints of chromosomal rearrangements in B lymphocytes (Barlow et  
502 al., 2013).

503 We posit that the persistence of unresolved HR intermediates generated following  
504 recombination-mediated fork restart leads to the manifestation of aberrant mitotic  
505 structures including chromatin bridges, HR-UFBs, and micronuclei that enable rampant  
506 fusions of broken chromosomes and amplification of replication-associated DNA damage  
507 during the next cell cycle. Our studies show that such extensive chromosomal instability  
508 and genomic damage consequently activate p53-dependent G2/M arrest and apoptosis.  
509 Concurrently, these resolvase-null B cells exhibit a type I IFN transcriptional signature,  
510 potentially a ramification of high cytoplasmic levels of self-DNA. The synthetic lethality of  
511 GEN1 and MUS81 deficiencies in B cells highlights the essentiality of structure-selective  
512 endonucleases in eliminating replication-derived recombination intermediates to  
513 safeguard the genomic integrity of proliferating cells and to permit the sustained  
514 proliferation and survival capacities required for the proper development and functionality  
515 of B lymphocytes, and possibly other immune cells.

516

## 517 **ACKNOWLEDGEMENTS**

518 We would like to thank the past and present members of the Chaudhuri and the  
519 Petrini labs for technical assistance, productive discussions, and constructive feedback.  
520 J.C. was supported by grants from the NIH (R01AI072194, R01AI124186, R56AI072194,  
521 U54CA137788, and P30CA008748), the Starr Cancer Research Foundation, the Ludwig  
522 Center for Cancer Immunotherapy, MSKCC Functional Genomics, and the Geoffrey  
523 Beene Cancer Center. J.H.J.P. was supported by grants from the NIH (R01GM56888,  
524 R35GM136278, U54OD020355, and P30CA008748). We thank A. Bravo for help with  
525 maintenance of the mouse colony. We acknowledge the use of the Memorial Sloan  
526 Kettering Cancer Mouse Genetics Core Facility.

527

## 528 **AUTHOR CONTRIBUTIONS**

529 Keith Conrad Fernandez, Conceptualization, Methodology, Investigation, Formal  
530 Analysis, Visualization, Writing – Original Draft Preparation, Writing – Review & Editing;  
531 Laura Feeney, Methodology, Investigation, Formal Analysis, Visualization, Writing –  
532 Original Draft Preparation; Ryan M. Smolkin, Software, Formal Analysis, Writing – Review  
533 & Editing; Allysia J. Matthews, Methodology, Investigation, Formal Analysis; Wei-Feng

534 Yen, Methodology, Investigation, Formal Analysis; John H.J. Petrini, Conceptualization,  
535 Resources, Writing – Review & Editing, Supervision, Project Administration, Funding  
536 Acquisition; Jayanta Chaudhuri, Conceptualization, Resources, Writing – Review &  
537 Editing, Supervision, Project Administration, Funding Acquisition

538

## 539 REFERENCES

540 Ait Saada A, Lambert SAE, Carr AM. 2018. Preserving replication fork integrity and  
541 competence via the homologous recombination pathway. *DNA Repair* **71**: 135–147.  
542 doi:10.1016/j.dnarep.2018.08.017

543 Alt FW, Zhang Y, Meng FL, Guo C, Schwer B. 2013. Mechanisms of programmed DNA  
544 lesions and genomic instability in the immune system. *Cell* **152**:417–429.  
545 doi:10.1016/j.cell.2013.01.007

546 Auwera GA, Carneiro MO, Hartl C, Poplin R, del Angel G, Levy-Moonshine A, Jordan T,  
547 Shakir K, Roazen D, Thibault J, Banks E, Garimella K v., Altshuler D, Gabriel S,  
548 DePristo MA. 2013. From FastQ Data to High-Confidence Variant Calls: The  
549 Genome Analysis Toolkit Best Practices Pipeline. *Current Protocols in Bioinformatics*  
550 **43**. doi:10.1002/0471250953.bi1110s43

551 Barlow JH, Faryabi RB, Callén E, Wong N, Malhowski A, Chen HT, Gutierrez-Cruz G,  
552 Sun HW, McKinnon P, Wright G, Casellas R, Robbiani DF, Staudt L, Fernandez-  
553 Capetillo O, Nussenzweig A. 2013. Identification of early replicating fragile sites that  
554 contribute to genome instability. *Cell* **152**:620–632. doi:10.1016/j.cell.2013.01.006

555 Basso K, Dalla-Favera R. 2015. Germinal centres and B cell lymphomagenesis. *Nature*  
556 *Reviews Immunology* **15**:172–184. doi:10.1038/nri3814

557 Berti M, Cortez D, Lopes M. 2020. The plasticity of DNA replication forks in response to  
558 clinically relevant genotoxic stress. *Nature Reviews Molecular Cell Biology* **21**:633–  
559 651. doi:10.1038/s41580-020-0257-5

560 Blanco MG, Matos J. 2015. Hold your horSSEs: Controlling structure-selective  
561 endonucleases MUS81 and Yen1/GEN1. *Frontiers in Genetics* **6**:1–11.  
562 doi:10.3389/fgene.2015.00253



- 563 Brazão TF, Johnson JS, Müller J, Heger A, Ponting CP, Tybulewicz VLJ. 2016. Long  
564 noncoding RNAs in B-cell development and activation. *Blood* **128**:e10–e19.  
565 doi:10.1182/blood-2015-11-680843
- 566 Carr AM, Lambert S. 2013. Replication stress-induced genome instability: The dark side  
567 of replication maintenance by homologous recombination. *Journal of Molecular*  
568 *Biology* **425**: 4733–4744. doi:10.1016/j.jmb.2013.04.023
- 569 Chan YW, Fugger K, West SC. 2018. Unresolved recombination intermediates lead to  
570 ultra-fine anaphase bridges, chromosome breaks and aberrations. *Nature Cell*  
571 *Biology* **20**:92–103. doi:10.1038/s41556-017-0011-1
- 572 Chan YW, West SC. 2018. A new class of ultrafine anaphase bridges generated by  
573 homologous recombination. *Cell Cycle* **17**:2101–2109.  
574 doi:10.1080/15384101.2018.1515555
- 575 Debatisse M, le Tallec B, Letessier A, Dutrillaux B, Brison O. 2012. Common fragile sites:  
576 Mechanisms of instability revisited. *Trends in Genetics* **28**: 22–32.  
577 doi:10.1016/j.tig.2011.10.003
- 578 Dendouga N, Gao H, Moechars D, Janicot M, Vialard J, McGowan CH. 2005. Disruption  
579 of Murine Mus81 Increases Genomic Instability and DNA Damage Sensitivity but  
580 Does Not Promote Tumorigenesis. *Molecular and Cellular Biology* **25**:7569–7579.  
581 doi:10.1128/mcb.25.17.7569-7579.2005
- 582 Dobin A, Davis CA, Schlesinger F, Drenkow J, Zaleski C, Jha S, Batut P, Chaisson M,  
583 Gingeras TR. 2013. STAR: ultrafast universal RNA-seq aligner. *Bioinformatics*  
584 **29**:15–21. doi:10.1093/bioinformatics/bts635
- 585 Fahl SP, Crittenden RB, Allman D, Bender TP. 2009. c-Myb Is Required for Pro-B Cell  
586 Differentiation. *The Journal of Immunology* **183**:5582–5592.  
587 doi:10.4049/jimmunol.0901187
- 588 Falquet B, Rass U. 2019. Structure-specific endonucleases and the resolution of  
589 chromosome underreplication. *Genes* **10**:1–22. doi:10.3390/genes10030232
- 590 Feng Y, Seija N, Di Noia JM, Martin A. 2020. AID in Antibody Diversification: There and  
591 Back Again. *Trends in Immunology* **41**:586–600. doi:10.1016/j.it.2020.04.009
- 592 Frankish A, Diekhans M, Jungreis I, Lagarde J, Loveland JE, Mudge JM, Sisu C, Wright  
593 JC, Armstrong J, Barnes I, Berry A, Bignell A, Boix C, Carbonell Sala S, Cunningham

- 594 F, di Domenico T, Donaldson S, Fiddes IT, García Girón C, Gonzalez JM, Grego T,  
595 Hardy M, Hourlier T, Howe KL, Hunt T, Izuogu OG, Johnson R, Martin FJ, Martínez  
596 L, Mohanan S, Muir P, Navarro FCP, Parker A, Pei B, Pozo F, Riera FC, Ruffier M,  
597 Schmitt BM, Stapleton E, Suner M-M, Sycheva I, Uszczynska-Ratajczak B, Wolf MY,  
598 Xu J, Yang YT, Yates A, Zerbino D, Zhang Y, Choudhary JS, Gerstein M, Guigó R,  
599 Hubbard TJP, Kellis M, Paten B, Tress ML, Flicek P. 2021. GENCODE 2021. *Nucleic  
600 Acids Research* **49**:D916–D923. doi:10.1093/nar/gkaa1087
- 601 Fujita M, Sasanuma H, Yamamoto KN, Harada H, Kurosawa A, Adachi N, Omura M,  
602 Hiraoka M, Takeda S, Hirota K. 2013. Interference in DNA Replication Can Cause  
603 Mitotic Chromosomal Breakage Unassociated with Double-Strand Breaks. *PLoS  
604 ONE* **8**:e60043. doi:10.1371/journal.pone.0060043
- 605 García-Luis J, Machín F. 2014. Mus81-Mms4 and Yen1 resolve a novel anaphase bridge  
606 formed by noncanonical Holliday junctions. *Nature Communications* **5**:5652.  
607 doi:10.1038/ncomms6652
- 608 Garner E, Kim Y, Lach FP, Kottemann MC, Smogorzewska A. 2013. Human GEN1 and  
609 the SLX4-Associated Nucleases MUS81 and SLX1 Are Essential for the Resolution  
610 of Replication-Induced Holliday Junctions. *Cell Reports* **5**:207–215.  
611 doi:10.1016/j.celrep.2013.08.041
- 612 Gu Z, Eils R, Schlesner M. 2016. Complex heatmaps reveal patterns and correlations in  
613 multidimensional genomic data. *Bioinformatics* **32**:2847–2849.  
614 doi:10.1093/bioinformatics/btw313
- 615 Hanada K, Budzowska M, Davies SL, van Drunen E, Onizawa H, Beverloo HB, Maas A,  
616 Essers J, Hickson ID, Kanaar R. 2007. The structure-specific endonuclease Mus81  
617 contributes to replication restart by generating double-strand DNA breaks. *Nature  
618 Structural & Molecular Biology* **14**:1096–1104. doi:10.1038/nsmb1313
- 619 Hao Z, Rajewsky K. 2001. Homeostasis of Peripheral B Cells in the Absence of B Cell  
620 Influx from the Bone Marrow. *Journal of Experimental Medicine* **194**:1151–1164.  
621 doi:10.1084/jem.194.8.1151
- 622 Hardy RR, Carmack CE, Shinton SA, Kemp JD, Hayakawa K. 1991. Resolution and  
623 characterization of pro-B and pre-pro-B cell stages in normal mouse bone marrow.  
624 *Journal of Experimental Medicine* **173**:1213–1225. doi:10.1084/jem.173.5.1213



- 625 Heyer W-D. 2015. Regulation of Recombination and Genomic Maintenance. *Cold Spring*  
626 *Harbor Perspectives in Biology* **7**:a016501. doi:10.1101/cshperspect.a016501
- 627 Hobeika E, Thiemann S, Storch B, Jumaa H, Nielsen PJ, Pelanda R, Reth M. 2006.  
628 Testing gene function early in the B cell lineage in mb1-cre mice. *Proceedings of the*  
629 *National Academy of Sciences of the United States of America* **103**:13789–13794.  
630 doi:10.1073/pnas.0605944103
- 631 Kikuchi K, Narita T, Pham VT, Iijima J, Hirota K, Keka IS, Mohiuddin, Okawa K, Hori T,  
632 Fukagawa T, Essers J, Kanaar R, Whitby MC, Sugasawa K, Taniguchi Y, Kitagawa  
633 K, Takeda S. 2013. Structure-Specific Endonucleases Xpf and Mus81 Play  
634 Overlapping but Essential Roles in DNA Repair by Homologous Recombination.  
635 *Cancer Research* **73**:4362–4371. doi:10.1158/0008-5472.CAN-12-3154
- 636 Korotkevich G, Sukhov V, Budin N, Shpak B, Artyomov MN, Sergushichev A. 2021. Fast  
637 gene set enrichment analysis. *bioRxiv* 060012. doi:10.1101/060012
- 638 Lambert S, Mizuno K, Blaisonneau J, Martineau S, Chanet R, Fréon K, Murray JM, Carr  
639 AM, Baldacci G. 2010. Homologous Recombination Restarts Blocked Replication  
640 Forks at the Expense of Genome Rearrangements by Template Exchange.  
641 *Molecular Cell* **39**:346–359. doi:10.1016/j.molcel.2010.07.015
- 642 LeBien TW, Tedder TF. 2008. B lymphocytes: how they develop and function. *Blood*  
643 **112**:1570–1580. doi:10.1182/blood-2008-02-078071
- 644 Liao Y, Smyth GK, Shi W. 2014. featureCounts: an efficient general purpose program for  
645 assigning sequence reads to genomic features. *Bioinformatics* **30**:923–930.  
646 doi:10.1093/bioinformatics/btt656
- 647 Liberzon A, Birger C, Thorvaldsdóttir H, Ghandi M, Mesirov JP, Tamayo P. 2015. The  
648 Molecular Signatures Database Hallmark Gene Set Collection. *Cell Systems* **1**:417–  
649 425. doi:10.1016/j.cels.2015.12.004
- 650 Love MI, Huber W, Anders S. 2014. Moderated estimation of fold change and dispersion  
651 for RNA-seq data with DESeq2. *Genome Biology* **15**:550. doi:10.1186/s13059-014-  
652 0550-8
- 653 Macheret M, Halazonetis TD. 2015. DNA replication stress as a hallmark of cancer.  
654 *Annual Review of Pathology: Mechanisms of Disease* **10**:425–448.  
655 doi:10.1146/annurev-pathol-012414-040424

- 656 Mayle R, Campbell IM, Beck CR, Yu Y, Wilson M, Shaw CA, Bjergbaek L, Lupski JR, Ira  
657 G. 2015. Mus81 and converging forks limit the mutagenicity of replication fork  
658 breakage. *Science* **349**:742–747. doi:10.1126/science.aaa8391
- 659 McDaniel LD, Chester N, Watson M, Borowsky AD, Leder P, Schultz RA. 2003.  
660 Chromosome instability and tumor predisposition inversely correlate with BLM  
661 protein levels. *DNA Repair* **2**:1387–1404. doi:10.1016/j.dnarep.2003.08.006
- 662 Mehta Anuja, Haber James E. 2014. Sources of DNA double-strand breaks and models  
663 of recombinational DNA repair. *Cold Spring Harbor Perspectives in Biology*  
664 **6**:a016428–a016428. doi:10.1101/cshperspect.a016428
- 665 Minocherhomji S, Ying S, Bjerregaard VA, Bursomanno S, Aleliunaite A, Wu W, Mankouri  
666 HW, Shen H, Liu Y, Hickson ID. 2015. Replication stress activates DNA repair  
667 synthesis in mitosis. *Nature* **528**:286–290. doi:10.1038/nature16139
- 668 Mohebi S, Mizuno K, Watson A, Carr AM, Murray JM. 2015. Checkpoints are blind to  
669 replication restart and recombination intermediates that result in gross chromosomal  
670 rearrangements. *Nature Communications* **6**:6357. doi:10.1038/ncomms7357
- 671 Naim V, Wilhelm T, Debatisse M, Rosselli F. 2013. ERCC1 and MUS81-EME1 promote  
672 sister chromatid separation by processing late replication intermediates at common  
673 fragile sites during mitosis. *Nature Cell Biology* **15**:1008–1015. doi:10.1038/ncb2793
- 674 Ölmezer G, Levikova M, Klein D, Falquet B, Fontana GA, Cejka P, Rass U. 2016.  
675 Replication intermediates that escape Dna2 activity are processed by Holliday  
676 junction resolvase Yen1. *Nature Communications* **7**:13157.  
677 doi:10.1038/ncomms13157
- 678 Pepe A, West SC. 2014a. MUS81-EME2 promotes replication fork restart. *Cell Reports*  
679 **7**:1048–1055. doi:10.1016/j.celrep.2014.04.007
- 680 Pepe A, West SC. 2014b. Substrate specificity of the MUS81-EME2 structure selective  
681 endonuclease. *Nucleic Acids Research* **42**:3833–3845. doi:10.1093/nar/gkt1333
- 682 Peschon JJ, Morrissey PJ, Grabstein KH, Ramsdell FJ, Maraskovsky E, Gliniak BC, Park  
683 LS, Ziegler SF, Williams DE, Ware CB, Meyer JD, Davison BL. 1994. Early  
684 lymphocyte expansion is severely impaired in interleukin 7 receptor-deficient mice.  
685 *Journal of Experimental Medicine* **180**:1955–1960. doi:10.1084/jem.180.5.1955

- 686 Petermann E, Helleday T. 2010. Pathways of mammalian replication fork restart. *Nature*  
687 *Reviews Molecular Cell Biology* **11**:683–687. doi:10.1038/nrm2974
- 688 Pieper K, Grimbacher B, Eibel H. 2013. B-cell biology and development. *Journal of Allergy*  
689 *and Clinical Immunology* **131**: 959–971. doi:10.1016/j.jaci.2013.01.046
- 690 Sarbajna S, Davies D, West SC. 2014. Roles of SLX1-SLX4, MUS81-EME1, and GEN1  
691 in avoiding genome instability and mitotic catastrophe. *Genes and Development*  
692 **28**:1124–1136. doi:10.1101/gad.238303.114
- 693 Sarlós K, Biebricher A, Petermann E, Wuite GJL, Hickson ID. 2017. Knotty Problems  
694 during Mitosis: Mechanistic Insight into the Processing of Ultrafine DNA Bridges in  
695 Anaphase. *Cold Spring Harbor Symposia on Quantitative Biology* **82**:187–195.  
696 doi:10.1101/sqb.2017.82.033647
- 697 Schatz DG, Swanson PC. 2011. V(D)J Recombination: Mechanisms of Initiation. *Annual*  
698 *Review of Genetics* **45**:167–202. doi:10.1146/annurev-genet-110410-132552
- 699 Scully R, Elango R, Panday A, Willis NA. 2021. Recombination and restart at blocked  
700 replication forks. *Current Opinion in Genetics and Development* **71**: 154–162.  
701 doi:10.1016/j.gde.2021.08.003
- 702 Shimizu N, Akagawa R, Takeda S, Sasanuma H. 2020. The MRE11 nuclease promotes  
703 homologous recombination not only in DNA double-strand break resection but also  
704 in post-resection in human TK6 cells. *Genome Instability & Disease* **1**:184–196.  
705 doi:10.1007/s42764-020-00015-w
- 706 Smolkin R. 2022. RNA\_Seq\_MusGen. GitHub.  
707 [https://github.com/ryashka/RNA\\_Seq\\_MusGen](https://github.com/ryashka/RNA_Seq_MusGen)
- 708 Subramanian A, Tamayo P, Mootha VK, Mukherjee S, Ebert BL, Gillette MA, Paulovich  
709 A, Pomeroy SL, Golub TR, Lander ES, Mesirov JP. 2005. Gene set enrichment  
710 analysis: A knowledge-based approach for interpreting genome-wide expression  
711 profiles. *Proceedings of the National Academy of Sciences* **102**:15545–15550.  
712 doi:10.1073/pnas.0506580102
- 713 Tiwari A, Addis Jones O, Chan K-L. 2018. 53BP1 can limit sister-chromatid rupture and  
714 rearrangements driven by a distinct ultrafine DNA bridging-breakage process. *Nature*  
715 *Communications* **9**:677. doi:10.1038/s41467-018-03098-y

- 716 Victora GD, Nussenzweig MC. 2012. Germinal Centers. *Annual Review of Immunology*  
717 **30**:429–457. doi:10.1146/annurev-immunol-020711-075032
- 718 Wechsler T, Newman S, West SC. 2011. Aberrant chromosome morphology in human  
719 cells defective for Holliday junction resolution. *Nature* **471**:642–646.  
720 doi:10.1038/nature09790
- 721 West SC, Blanco MG, Chan YW, Matos J, Sarbajna S, Wyatt HDM. 2016. Resolution of  
722 recombination intermediates: Mechanisms and regulation. *Cold Spring Harbor*  
723 *Symposia on Quantitative Biology* **80**:103–109. doi:10.1101/sqb.2015.80.027649
- 724 West SC, Chan YW. 2017. Genome Instability as a Consequence of Defects in the  
725 Resolution of Recombination Intermediates. *Cold Spring Harbor Symposia on*  
726 *Quantitative Biology* **82**:207–212. doi:10.1101/sqb.2017.82.034256
- 727 Wickham H. 2016. *ggplot2: Elegant Graphics for Data Analysis*. Springer-Verlag, New  
728 York. <https://ggplot2.tidyverse.org>
- 729 Wild P, Matos J. 2016. Cell cycle control of DNA joint molecule resolution. *Current Opinion*  
730 *in Cell Biology* **40**:74–80. doi:10.1016/j.ceb.2016.02.018
- 731 Xu Z, Zan H, Pone EJ, Mai T, Casali P. 2012. Immunoglobulin class-switch DNA  
732 recombination: Induction, targeting and beyond. *Nature Reviews Immunology* **12**:  
733 517–531. doi:10.1038/nri3216
- 734 Ying S, Minocherhomji S, Chan KL, Palmai-Pallag T, Chu WK, Wass T, Mankouri HW,  
735 Liu Y, Hickson ID. 2013. MUS81 promotes common fragile site expression. *Nature*  
736 *Cell Biology* **15**:1001–1007. doi:10.1038/ncb2773
- 737 Young C, Brink R. 2021. The unique biology of germinal center B cells. *Immunity*  
738 **54**:1652–1664. doi:10.1016/j.immuni.2021.07.015
- 739 Zeman MK, Cimprich KA. 2014. Causes and consequences of replication stress. *Nature*  
740 *Cell Biology* **16**:2–9. doi:10.1038/ncb2897

741

## 742 **MATERIALS AND METHODS**

### 743 Mice

744 *Gen1*<sup>-/-</sup> mice were generated at the Memorial Sloan Kettering Cancer Center Mouse  
745 Genetics Core Facility. *Mus81*<sup>fl/fl</sup> mice were generated using ES cell clone purchased from  
746 EUCOMM. Experiments were performed using mice between 8- and 16-week-old. When

747 littermate controls are not available, age-matched controls were employed in  
748 experiments. All mice were housed and maintained in groups of five under specific  
749 pathogen-free conditions, and euthanized at the time of analyses in accordance with  
750 guidelines for animal care established by Memorial Sloan Kettering Cancer Center  
751 Research Animal Resource Center and the Institutional Animal Care and Use Committee  
752 (IACUC).

753

#### 754 Flow cytometry

755 Single-cell suspensions were prepared from mouse spleen, mesenteric lymph nodes, and  
756 Peyer's patches by pressing through a 70  $\mu$ m cell strainer (Corning), and bone marrow  
757 cells were harvested from the tibia. Splenic and bone marrow suspensions were  
758 resuspended in red blood cell lysis buffer (150 mM  $\text{NH}_4\text{Cl}$ , 10 mM  $\text{KHCO}_3$ , 0.1 mM EDTA)  
759 for 5 minutes at room temperature and then neutralized with B cell media (RPMI 1640  
760 with L-glutamine (Gibco) supplemented with 15% fetal bovine serum (Corning), 1%  
761 penicillin-streptomycin (GeminiBio), 2 mM L-glutamine (Memorial Sloan Kettering Cancer  
762 Center Media Preparation Facility), and 55  $\mu$ M  $\beta$ -Mercaptoethanol (Gibco)). After washing  
763 with PBS, cells were stained with Zombie Red™ fixable viability dye (BioLegend) and rat  
764 anti-mouse CD16/CD32 Fc Block (BD Biosciences), followed by staining with antibodies  
765 for cell surface markers at 4°C for 30 minutes. The following antibodies and their  
766 respective clones were used in this study: B220 (RA3-6B2), CD19 (ID3), TCR $\beta$  (H57-  
767 597), CD43 (R2/60), IgD (11.26.2a), IgM (II/41; polyclonal), CD25 (PC61), CD249 (BP-  
768 1), c-Kit (2B8), CD93 (AA4.1), CD24 (M1/69), CD138 (281-2), CD21/CD35 (7E9), CD23  
769 (B3B4), GL7 (GL7), CD95 (Jo2), and CD38 (90). All antibodies were purchased from BD  
770 Biosciences, eBioscience, and BioLegend. For intracellular cleaved caspase-3 staining,  
771 *ex vivo*-stimulated cells were stained with cell surface markers followed by staining with  
772 anti-cleaved caspase-3 antibody (C92-605; BD Biosciences) for 45 minutes at 4°C after  
773 processing with Fixation/Permeabilization kit (BD Biosciences) according to the  
774 manufacturer's protocol. Data was obtained using an LSR II flow cytometer (BD  
775 Biosciences) and analyzed with FlowJo 10.6 (BD Biosciences).

776

#### 777 Immunization

778 For SRBC immunization, packed SRBCs (Innovative Research) were washed thrice with  
779 PBS, counted with hemocytometer, and resuspended to a concentration of 10 million  
780 cells/ $\mu$ L. 500 million cells were then administered intraperitoneally. Mice were boosted  
781 with the same number of SRBCs on day 10 before spleens were harvested for analysis  
782 on day 14. For NP-CGG immunization, mice were injected intraperitoneally with 100  $\mu$ g  
783 NP-CGG (ratio 30–39; Biosearch Technologies) resuspended in Imject™ Alum adjuvant  
784 (Thermo Scientific). Mice were boosted on day 14 and euthanized on day 21 for analysis  
785 of immune response in the spleen.

786

#### 787 Primary B cell *ex vivo* stimulation

788 Splenic B cells were harvested and processed into single-cell suspensions by pressing  
789 through a 70  $\mu$ m cell strainer. Naïve B cells were then purified by negative selection using  
790 anti-CD43 microbeads (Miltenyi Biotec) according to the manufacturer's protocol. B cells  
791 were plated at a density of  $1 \times 10^6$  cells/mL in B cell media in a 6-well dish. B cells were  
792 then stimulated with one of the following cytokine cocktails: 30  $\mu$ g/mL LPS (Sigma); 30  
793  $\mu$ g/mL LPS plus 25 ng/mL IL-4 (R&D Systems); or 5  $\mu$ g/mL LPS, 2 ng/mL recombinant  
794 human TGF- $\beta$ 1 (R&D Systems), and 333 ng/mL anti-IgD dextran conjugates (Fina  
795 Biosolutions). Cultures were split by half at 48-hour and 72-hour post-stimulation.

796

#### 797 qPCR analysis

798 Total RNA was harvested from 48-hour *ex vivo* B cell cultures using Quick-RNA™  
799 Microprep Kit (ZymoResearch) and reverse transcribed to cDNA using High-Capacity  
800 cDNA Reverse Transcription Kit (Applied Biosystems). TaqMan™ probes specific for  
801 *Gen1* (Mm00724023\_m1), *Mus81* (Mm00724023\_m1), and *Ubc* (Mm01201237\_m1)  
802 were used to amplify the cDNA transcripts. qPCR experiments were performed with the  
803 TaqMan™ Fast Advanced Master Mix (Applied Biosystems) in a 384-well format using  
804 an Applied Biosystems QuantStudio 6 Flex instrument. Relative gene expression was  
805 calculated using the  $2^{-\Delta\Delta CT}$  method and normalized to *Ubc* expression.

806

#### 807 Proliferation analysis



808 Purified naïve splenic B cells were stained with 5  $\mu$ M CellTrace™ Violet (Invitrogen) in  
809 PBS for 20 minutes at room temperature in the dark. Cells were washed with B cell media  
810 to quench the dye before resuspension in fresh B cell media and subsequent incubation  
811 for at least 10 minutes at 37°C. Equal labeling between the genotypes was verified by  
812 flow cytometry immediately after labeling. Cytokine cocktails were then added to the B  
813 cell cultures to initiate stimulation.

814

#### 815 Cell cycle analysis

816 Prior to flow cytometric analysis, *ex vivo* B cells were treated with 10  $\mu$ M EdU for 1 hour.  
817 Cells were harvested and washed with PBS before staining with antibodies for surface  
818 proteins. Cells were then processed using Click-iT™ EdU Alexa Fluor™ 488 Flow  
819 Cytometry Assay Kit (Invitrogen) according to the manufacturer's protocol. Cells were  
820 subsequently stained with FxCycle™ Violet Stain (Invitrogen) for 15 minutes at room  
821 temperature in the dark before flow cytometry.

822

#### 823 RNA-sequencing library generation and analyses

824 B cells were cultured for 48 hours before total RNA was extracted using Quick-RNA™  
825 Microprep Kit (ZymoResearch) and mRNA was isolated using the NEBNext® Poly(A)  
826 mRNA Magnetic Isolation (New England BioLabs). Stranded Illumina libraries were  
827 prepared with Swift Rapid RNA Library Kit according to the manufacturer's instructions  
828 (Swift Biosciences). Indexed libraries were sequenced on a HiSeq X Ten platform, and  
829 an average of 30 million 150-bp paired-end reads were generated for each sample  
830 (Novogene, Beijing, China). The resulting FastQ files were processed to remove adapters  
831 and low-quality reads, using GATK v4.1.9.0 (Auwera et al., 2013). STAR v2.7.7a (Dobin  
832 et al., 2013) aligned the reads to GRCm38.p6 and gencode vM25 (Frankish et al., 2021),  
833 and GATK removed the duplicates. A count matrix was generated using featureCounts  
834 v2.0.1 (Liao et al., 2014), and DESeq2 v1.30.1 (Love et al., 2014) generated differential  
835 expression matrices. ggPlot2 v3.3.4 (Wickham, 2016) was used for volcano plots,  
836 highlighting genes that fall in the designated areas (see text). fgsea v1.16.0 (Korotkevich  
837 et al., 2021) and msigdb h.all.v7.4 (Liberzon et al., 2015; Subramanian et al., 2005)  
838 analyzed the differentially expressed genes (those with FDR <0.05), in DKO cells

839 compared to control cells to determine which gene sets were enriched and de-enriched.  
840 Then, ggplot2 and a modified fgsea script was used to generate GSEA plots. Lastly, the  
841 feature count matrix was also used to produce normalized TPM values for all genes in  
842 each sample; these were then plotted with ComplexHeatmap v2.6.2 (Gu et al., 2016). All  
843 scripts are deposited in GitHub (Smolkin R., 2022). For the analysis of GSE720181, the  
844 dataset was downloaded as a featureCounts matrix and converted to TPM values in R  
845 v4.0.5.

846

#### 847 Metaphase spreads

848 Metaphase chromosome spreads were prepared by incubating cells with 100 µg/mL  
849 KaryoMAX™ Colcemid™ Solution in PBS (Gibco) for 3 hours. Cells were harvested at  
850 1000 rpm and resuspended in 75 mM KCl at 37°C for 15 minutes. Cells were fixed in a  
851 3:1 mixture of ice-cold methanol/acetic acid at least overnight at –20°C. Samples were  
852 then dropped onto pre-cleaned slides, briefly steamed (<5 seconds) over an 80°C water  
853 bath to disperse nuclei and air-dried overnight at room temperature. Slides were Giemsa  
854 stained and mounted using Fisher Chemical™ Permount™ Mounting Medium (Fisher  
855 Scientific). Images were acquired on an Olympus IX50-S8F microscope using a 100x  
856 objective and images were analyzed using ImageJ.

857

#### 858 Telomere FISH

859 Metaphase chromosome spreads were prepared and dropped onto slides as described  
860 above. Instead of Giemsa staining, samples were treated with 100 µg/mL RNase A for 1  
861 hour at 37°C, dehydrated with a series of 70%, 90% and 100% ethanol for 5 minutes each  
862 at room temperature, then allowed to air dry. Hybridization with 0.5 µg/mL CY-3  
863 (CCCTAA)<sub>3</sub> probe (PNA Bio) was carried out in hybridization buffer (10mM Tris pH 7.5,  
864 70% formamide, 0.5% blocking reagent (Roche)). Samples were denatured at 75°C for 5  
865 minutes then hybridization was allowed to proceed at room temperature for 16 hours.  
866 Slides were washed twice in wash buffer (10 mM Tris pH 7.5, 0.1% BSA, 70% formamide)  
867 and then three times in PBS/0.15% Triton X. Slides were then incubated for 10 minutes  
868 at room temperature in SYTOX™ Green Nucleic Acid Stain (diluted to 0.5 mM in PBS).  
869 After a final PBS wash, slides were mounted with ProLong™ Gold Antifade Mountant with



870 DAPI (Invitrogen). Images were acquired on a DeltaVision Elite Cell Imaging System (GE  
871 Healthcare Life Sciences) with a CMOS Camera on an Olympus IX-71 microscope using  
872 a 60X objective. Images were analyzed using ImageJ.

873

874 Statistical analysis

875 Graphical representation of data and statistical analyses were performed using Prism 9  
876 (GraphPad Software). Tables were prepared using Numbers 11 (Apple).

Figure 1–figure supplement 1

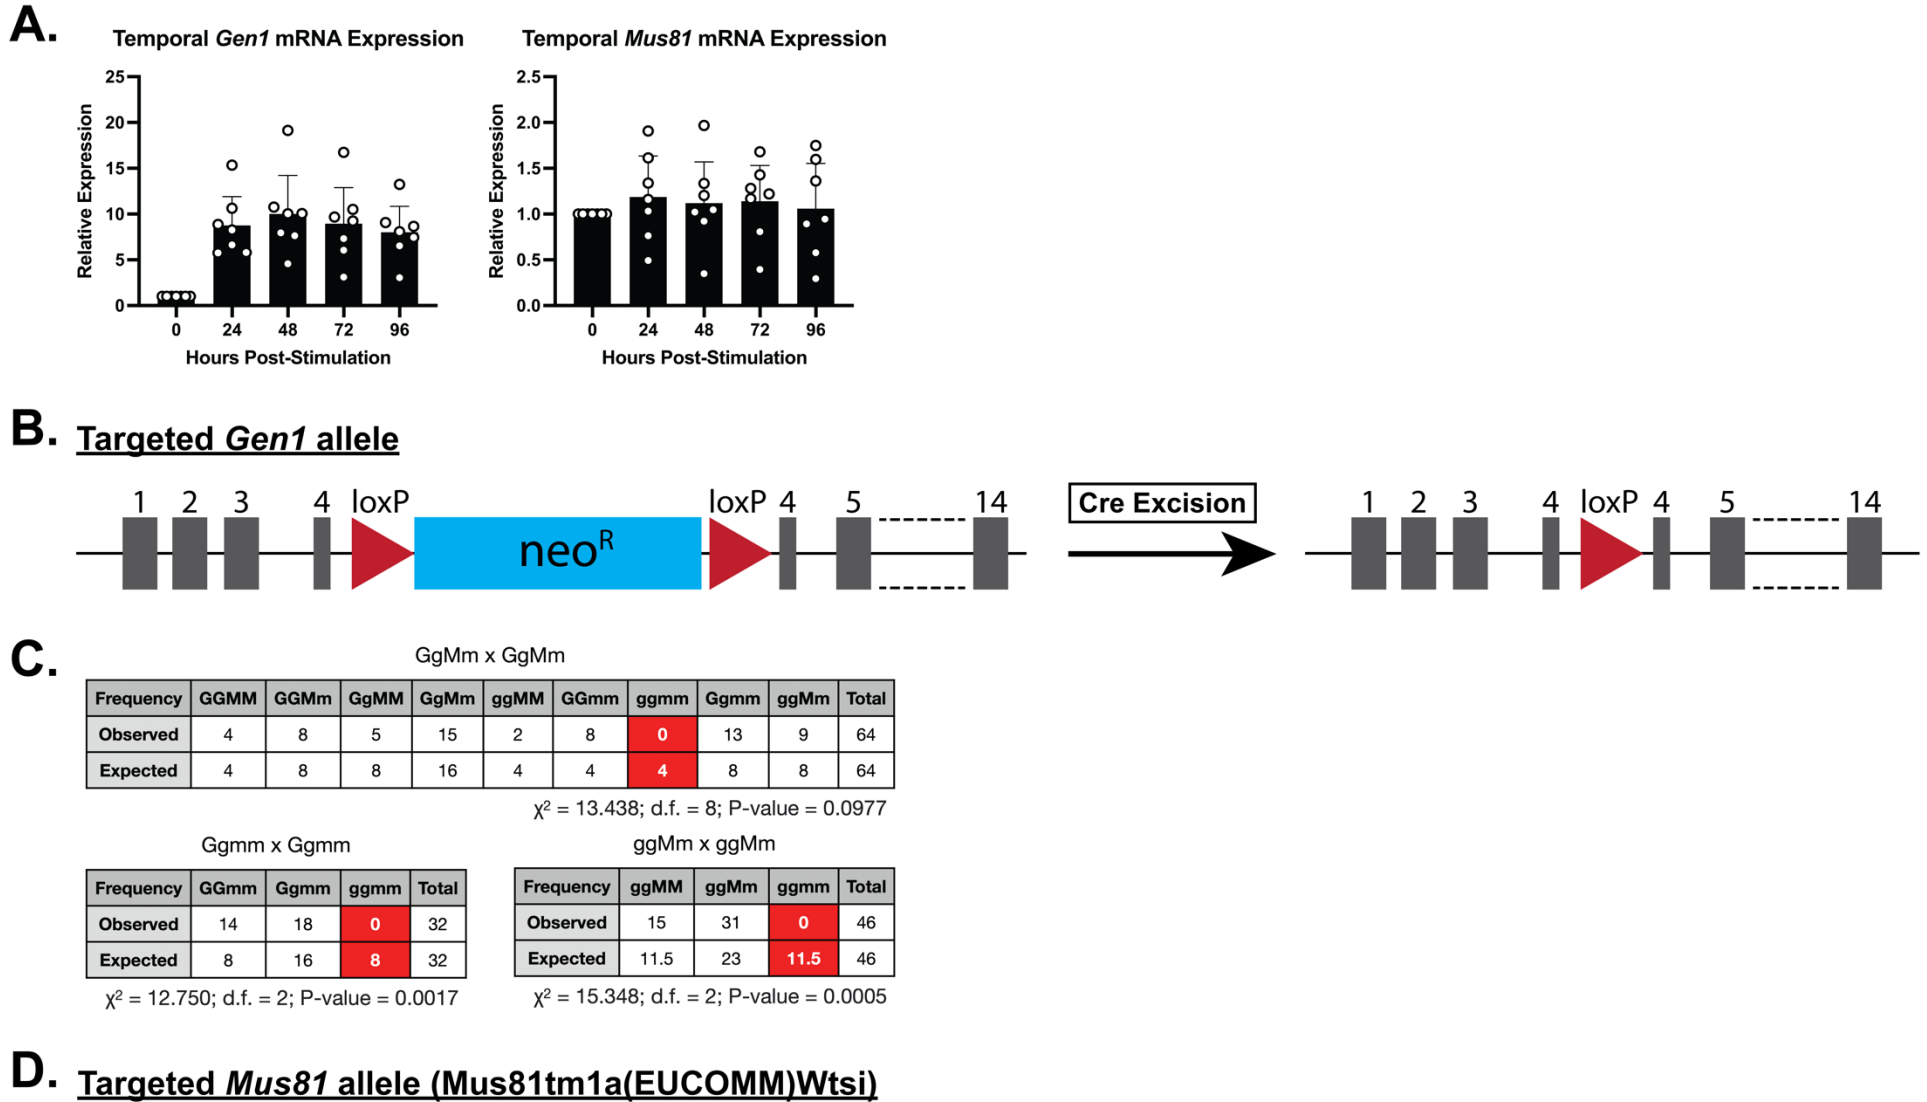

874 **Figure 1–figure supplement 1.** (A) Relative quantification of *Gen1* and *Mus81* mRNA  
875 transcript levels by RT-qPCR in wild-type mouse B cells stimulated in LPS+IL-4 culture  
876 from 0 hour to 96 hours post-stimulation. The expression level of the transcripts was  
877 normalized to the 0-hour time point. (B) Schematic of gene-targeting in generating the  
878 constitutive *Gen1*<sup>-/-</sup> mouse model. The reading frame of exon 4 is disrupted with a floxed  
879 neomycin-resistance gene cassette that was subsequently excised upon Cre  
880 recombinase expression. (C) Tables depicting the observed and expected frequencies of  
881 the genotypes of pups generated from the indicated breeding schemes: G and M  
882 represent the wild-type alleles of *Gen1* and *Mus81*, respectively, whereas g and m  
883 represent the null alleles of *Gen1* and *Mus81*; d.f. denotes degree(s) of freedom. (D)  
884 Schematic of the *Mus81*<sup>fl/fl</sup> allele in which exons 3 to 10 are flanked by loxP sites. When  
885 Cre recombinase is expressed under a tissue-specific promoter, exons 3 through 10 are  
886 excised, generating a null allele. FRT site is a remnant of pair that previously flanked a  
887 lacZ reporter-neomycin selection cassette.

Figure 2–figure supplement 1

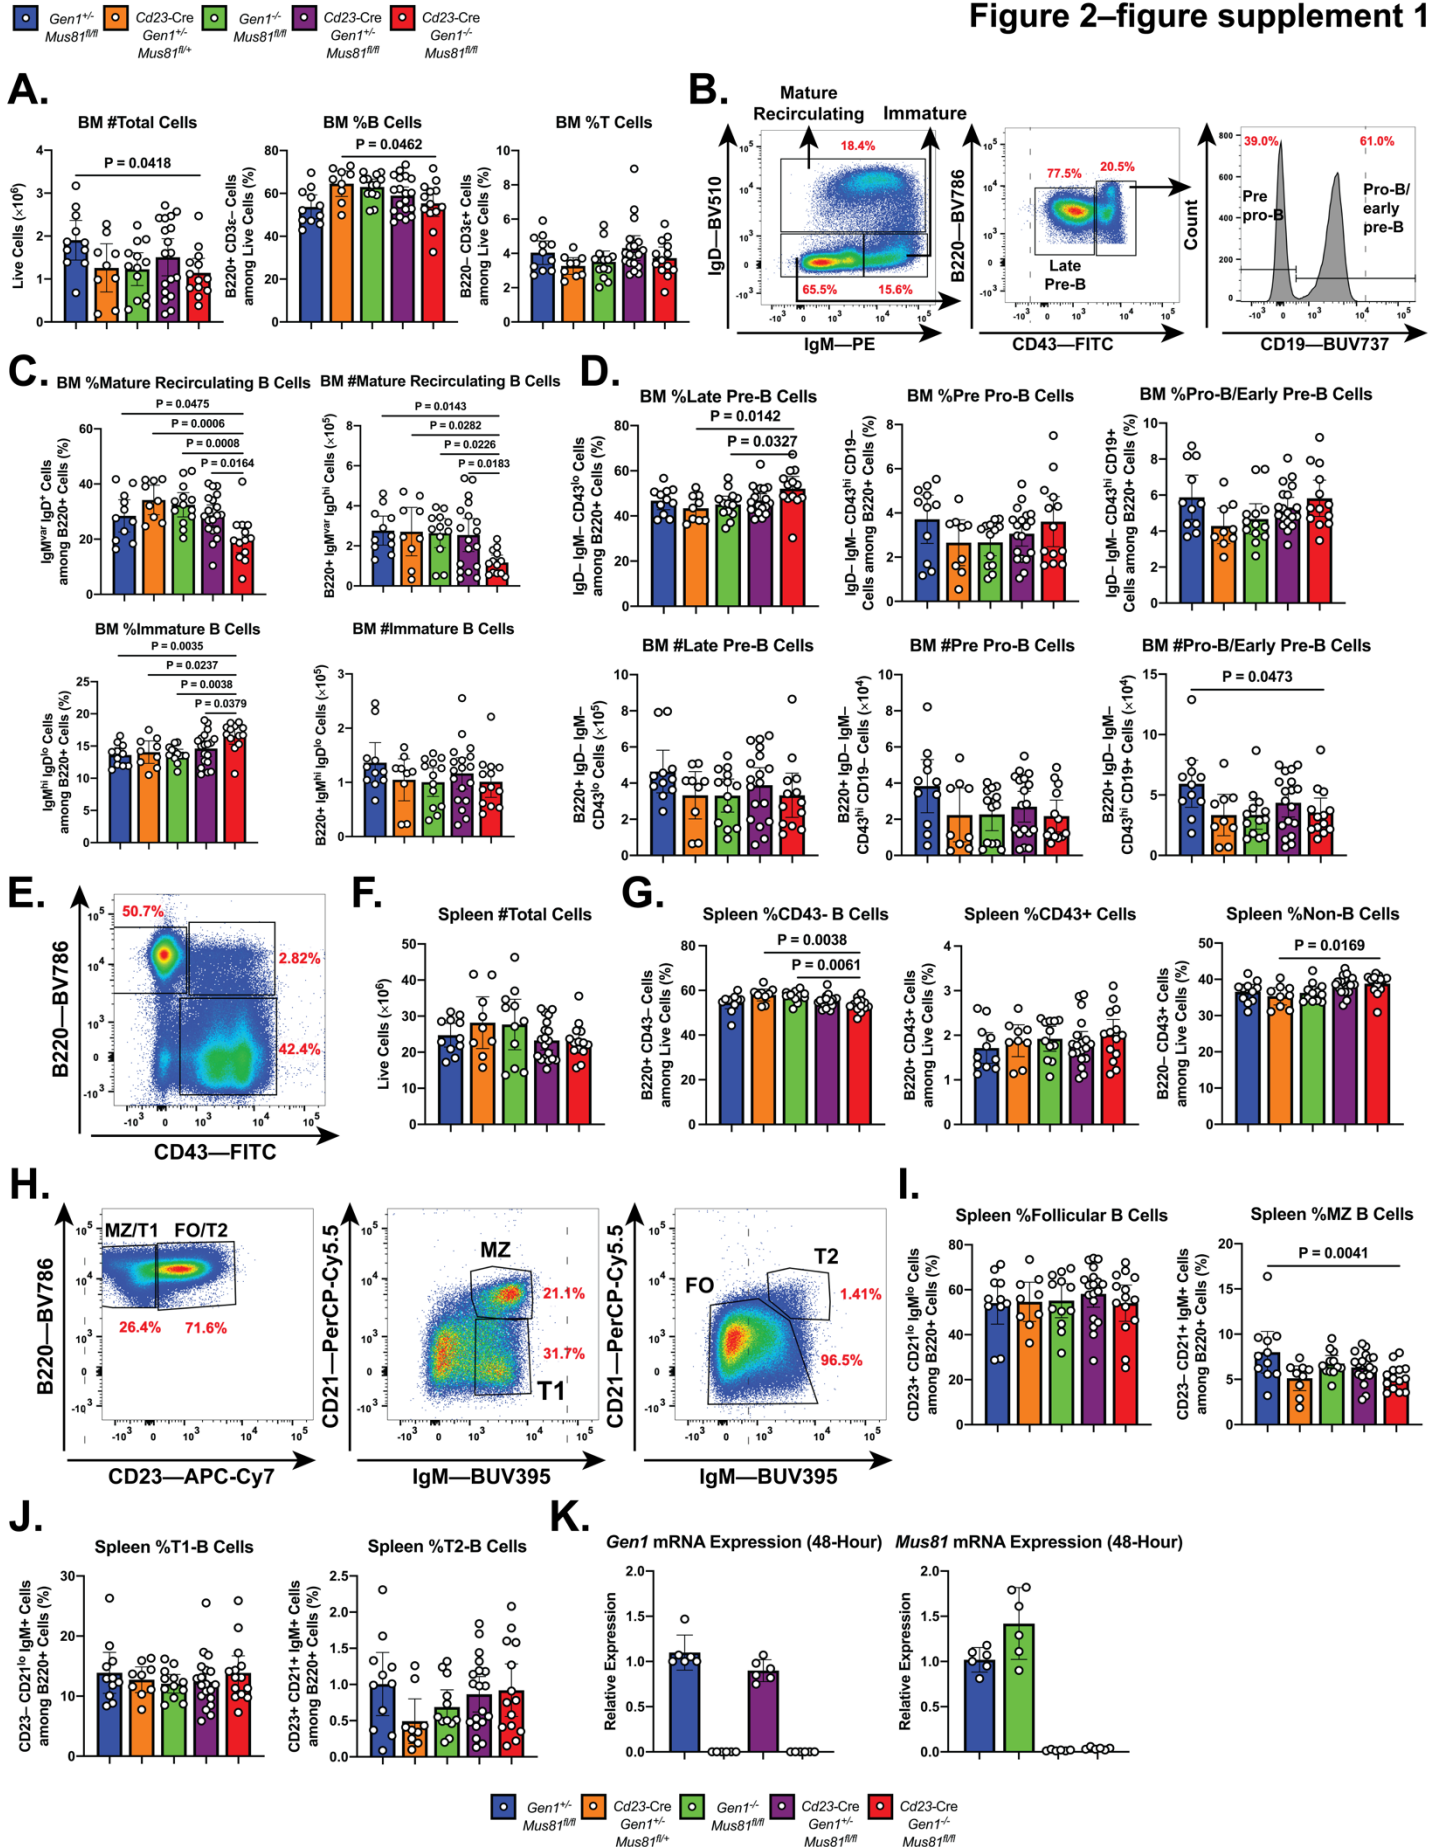

888 **Figure 2–figure supplement 1. Steady-state phenotyping and quantification of the**  
889 **splenic and bone marrow B cell populations in the *Cd23-Cre Gen1<sup>-/-</sup> Mus81<sup>fl/fl</sup>* mice.**  
890 (A) Quantification of bone marrow cellularity and percentage of total B and T cell  
891 populations in the bone marrows of mice of the indicated genotypes. (B) Gating strategy  
892 of the B-cell populations in the bone marrow: mature recirculating, immature, late-pre-B,  
893 pre-pro-B, and pro-B/early pre-B cells. (C) Quantification of the percentage among live  
894 B220+ B cells and absolute counts of mature recirculating and immature B cells. (D and  
895 E) Quantification of frequencies (D) and absolute counts (E) of late pre-B, pre-pro-B, and  
896 pro-B/early pre-B cells among live B220+ B cells. (F) Representative flow cytometric plot  
897 depicting gating strategy of B220+ CD43– B, B220+ CD43+ B, and non-B (B220– CD43+)  
898 cells in the spleen. (G and H) Quantification of the absolute number of live splenocytes,  
899 and of the percentage of splenic CD43– B, CD43+ B, and non-B cells in the mice of the  
900 indicated genotypes. (I) Gating strategy of the various splenic B cell subpopulations:  
901 marginal zone (MZ), follicular (FO), transitional-1 (T1), and transitional-2 B cells. (J)  
902 Frequencies of follicular and marginal zone B cells among total splenic B220+ cells. (K)  
903 Frequencies of T1 and T2 B cells among whole B220+ B cells in the spleen. (L) Relative  
904 expression of *Gen1* and *Mus81* mRNA transcripts in LPS+IL-4-activated B cells of the  
905 indicated genotypes at 48 hours after stimulation. Data in (A)–(L) are from three  
906 independent experiments with 11 to 18 mice per genotype. Data in (M) are from three  
907 independent experiments with 6 mice per genotype. Bars depict the arithmetic mean and  
908 error bars represent the 95% confidence interval of the measured parameters. P-values  
909 were calculated with ordinary one-way ANOVA analysis with Dunnett’s multiple  
910 comparisons test without pairing. All means were compared to the *Cd23-Cre Gen1<sup>-/-</sup>*  
911 *Mus81<sup>fl/fl</sup>* group.

Figure 3—figure supplement 1

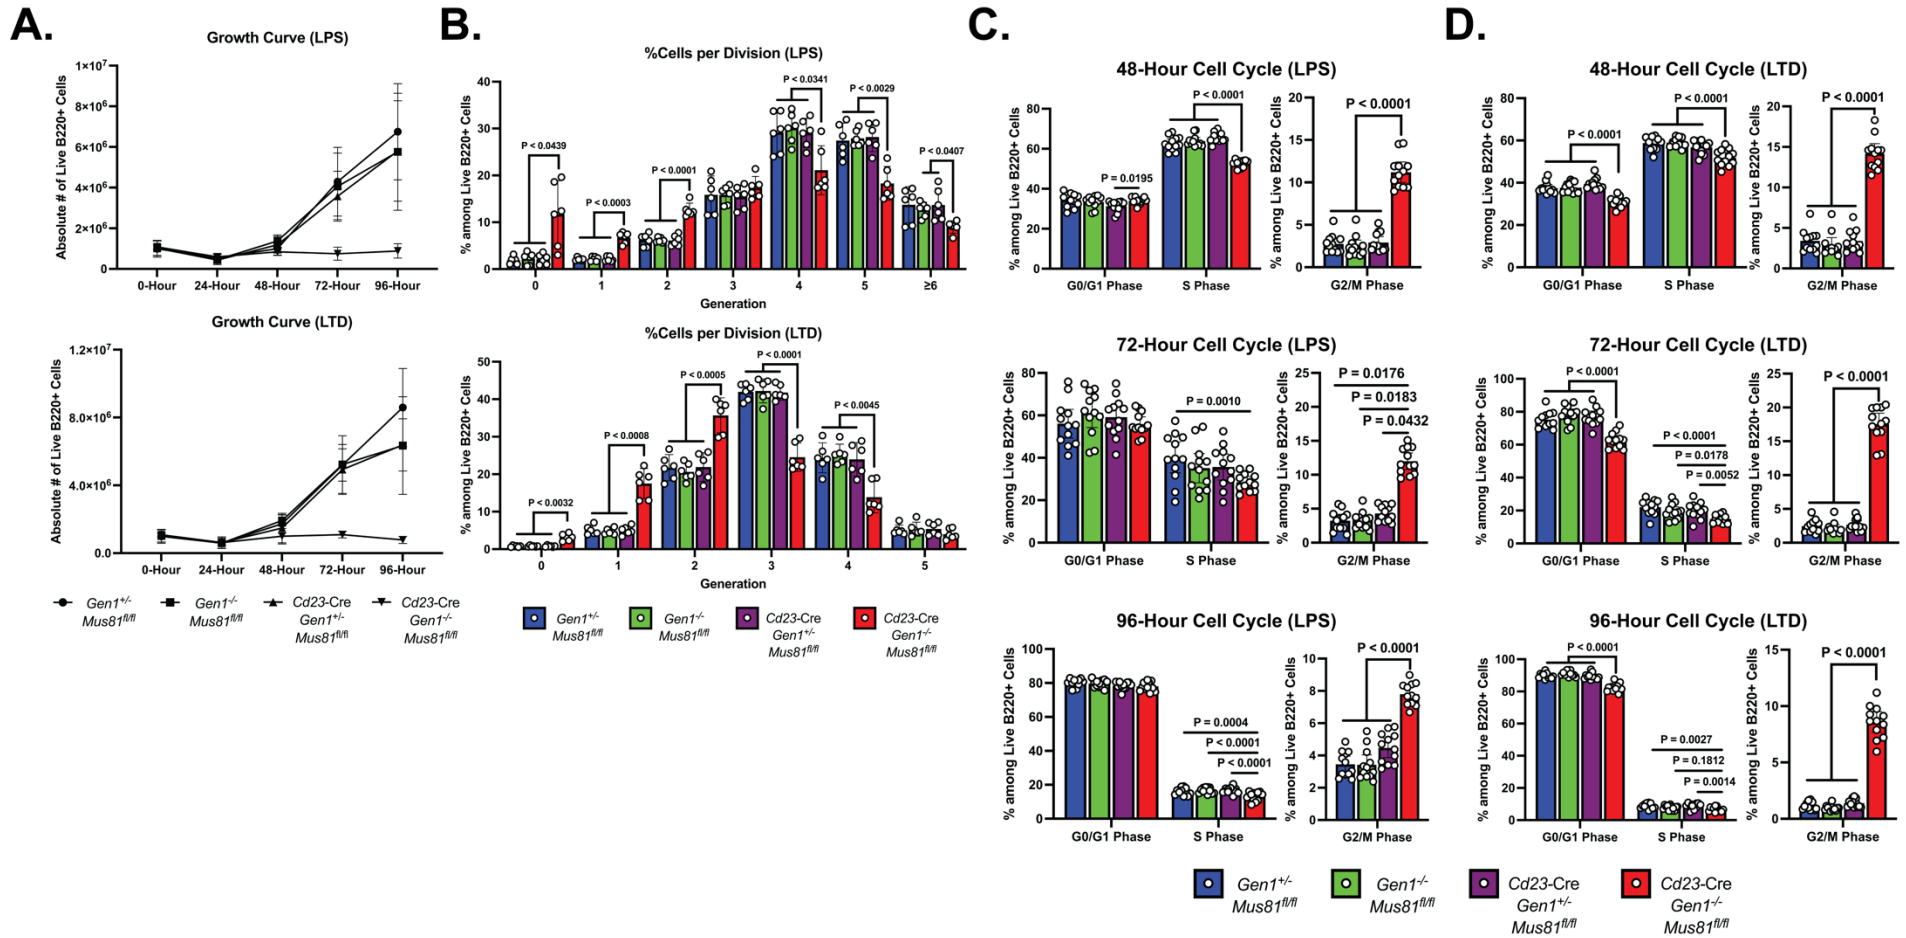



912 **Figure 3–figure supplement 1. *Ex vivo* characterization of DKO cells following LPS**  
913 **and LPS+TGF- $\beta$ +anti-IgD-dextran (LTD) stimulations.** (A) Growth curve of LPS- and  
914 LTD-activated B cells. (B) Percentage of live B220+ cells in each generation. (C and D)  
915 Cell cycle analysis of *ex vivo*-activated B cells. Frequency of cells among live B220+ B  
916 cells in G0/G1, S, and G2/M phases at 48, 72, and 96 hours of LPS (C) or LTD (D) culture.  
917 Data in (A) are from four independent experiments with 9 mice per genotype. Data in (B)  
918 are from three independent experiments with 6 mice per genotype. Data in (C) and (D)  
919 are from six independent experiments with 12 mice per genotype. Bars display the  
920 arithmetic mean and error bars represent the 95% confidence interval of the measured  
921 parameters. P-values were determined using ordinary two-way ANOVA analysis with  
922 Dunnett’s multiple comparisons test without pairing wherein the mean of the *Cd23-Cre*  
923 *Gen1*<sup>-/-</sup> *Mus81*<sup>fl/fl</sup> group was compared to the rest.

Figure 3–figure supplement 2

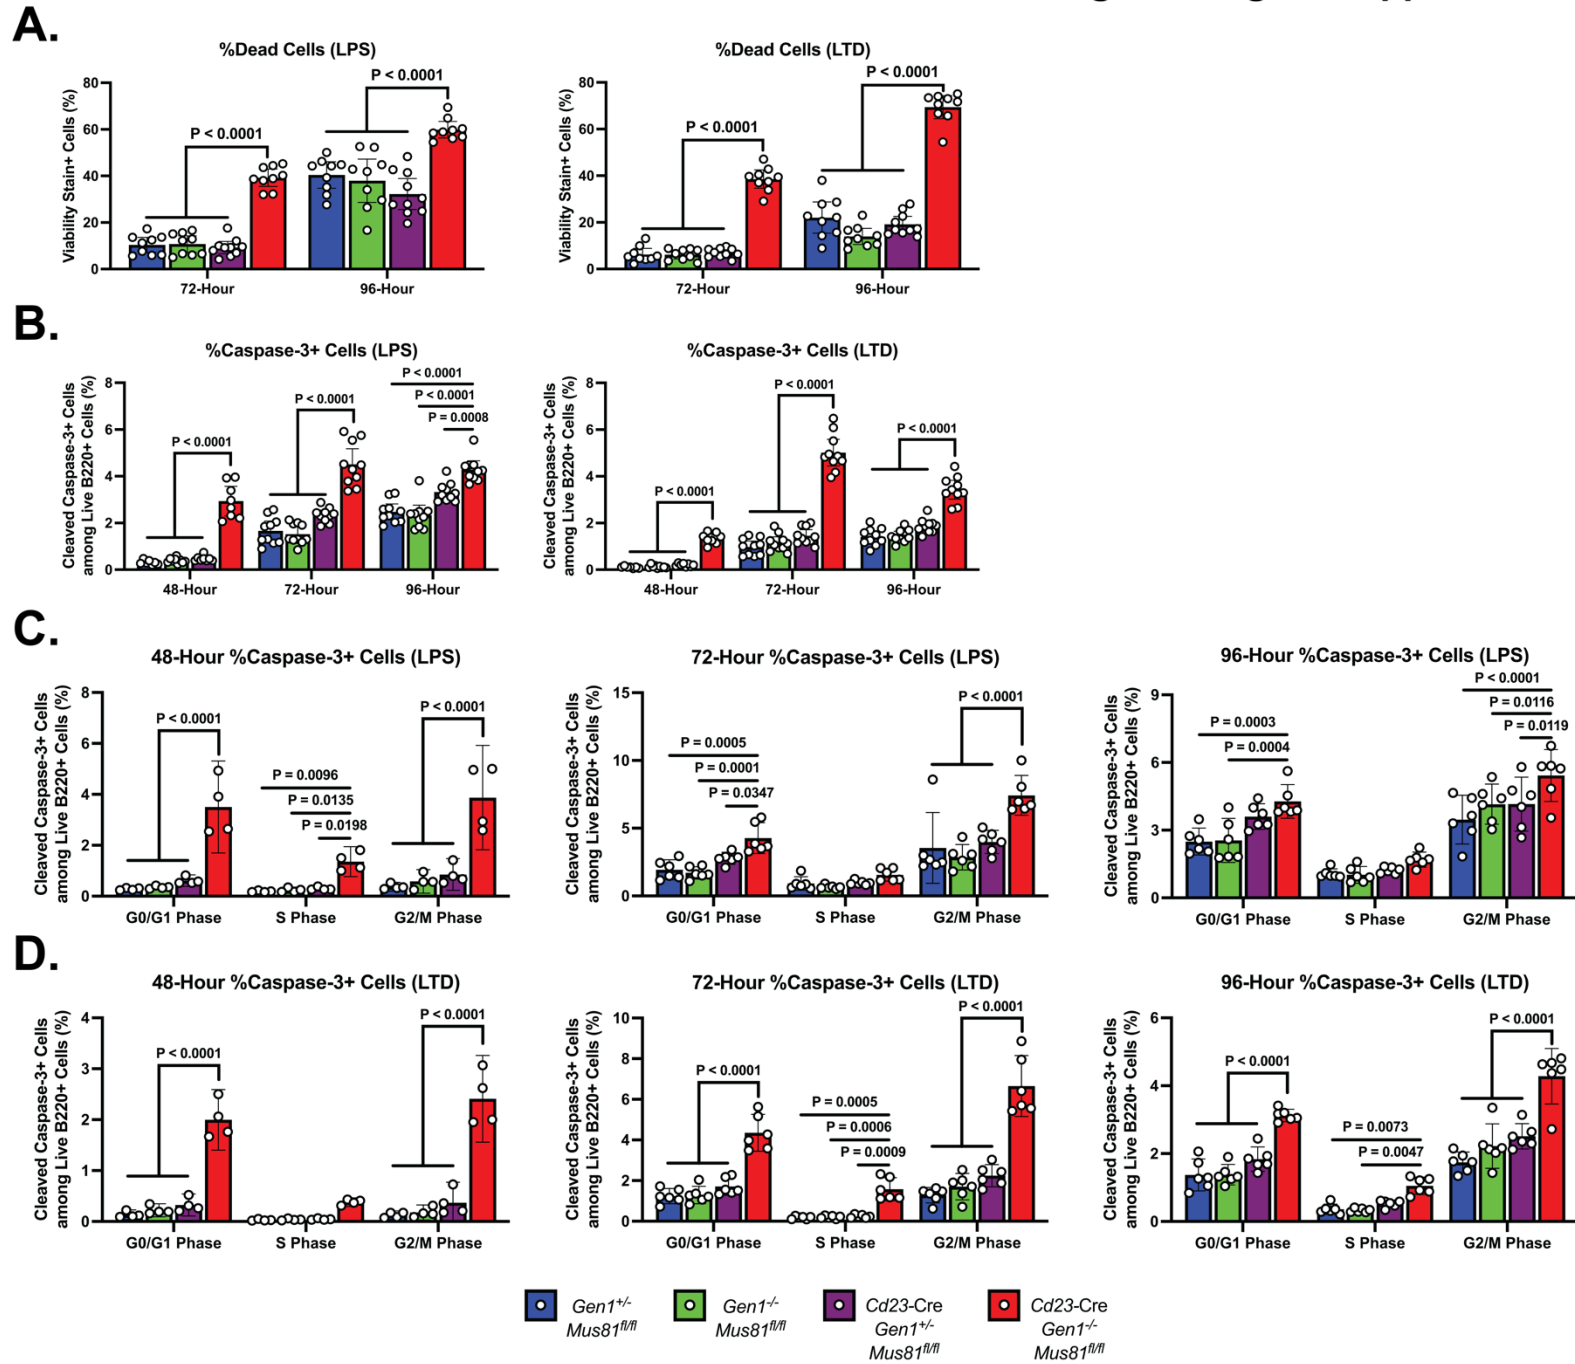

924 **Figure 3—figure supplement 2. Cell death profiles of DKO cells stimulated in LPS**  
925 **and LTD cultures.** (A) Frequency of dead cells quantified as a percentage of B220+  
926 singlets staining for the viability dye after 72 and 96 hours of culture in media with LPS or  
927 LPS+TGF- $\beta$ +anti-IgD-dextran (LTD). (B) Apoptosis in *ex vivo* B cell cultures. Percentage  
928 of cleaved caspase-3+ cells within the live B cell population at 48, 72, and 96 hours post-  
929 stimulation. (C and D) Cell cycle-specific determination of apoptosis in *ex vivo*-activated  
930 B cells. Frequency of cleaved caspase-3+ cells among live B220+ cells in each phase at  
931 48, 72, and 96 hours of LPS (C) or LTD (D) culture. Data in (A) are from four independent  
932 experiments with 9 mice per genotype. Data in (B) are from five independent experiments  
933 with 8 to 10 mice per genotype. Data in (C) and (D) are from two (48-hour) or three (72-  
934 and 96-hour) independent experiments with 4 to 6 mice per genotype. Bars represent the  
935 arithmetic mean and the error bars depict the 95% confidence interval of the measured  
936 parameters. P-values were calculated using ordinary two-way ANOVA analysis with  
937 Dunnett's multiple comparisons test in which the means were compared to that of the  
938 *Cd23-Cre Gen1<sup>-/-</sup> Mus81<sup>fl/fl</sup>* cohort.

Figure 4–figure supplement 1

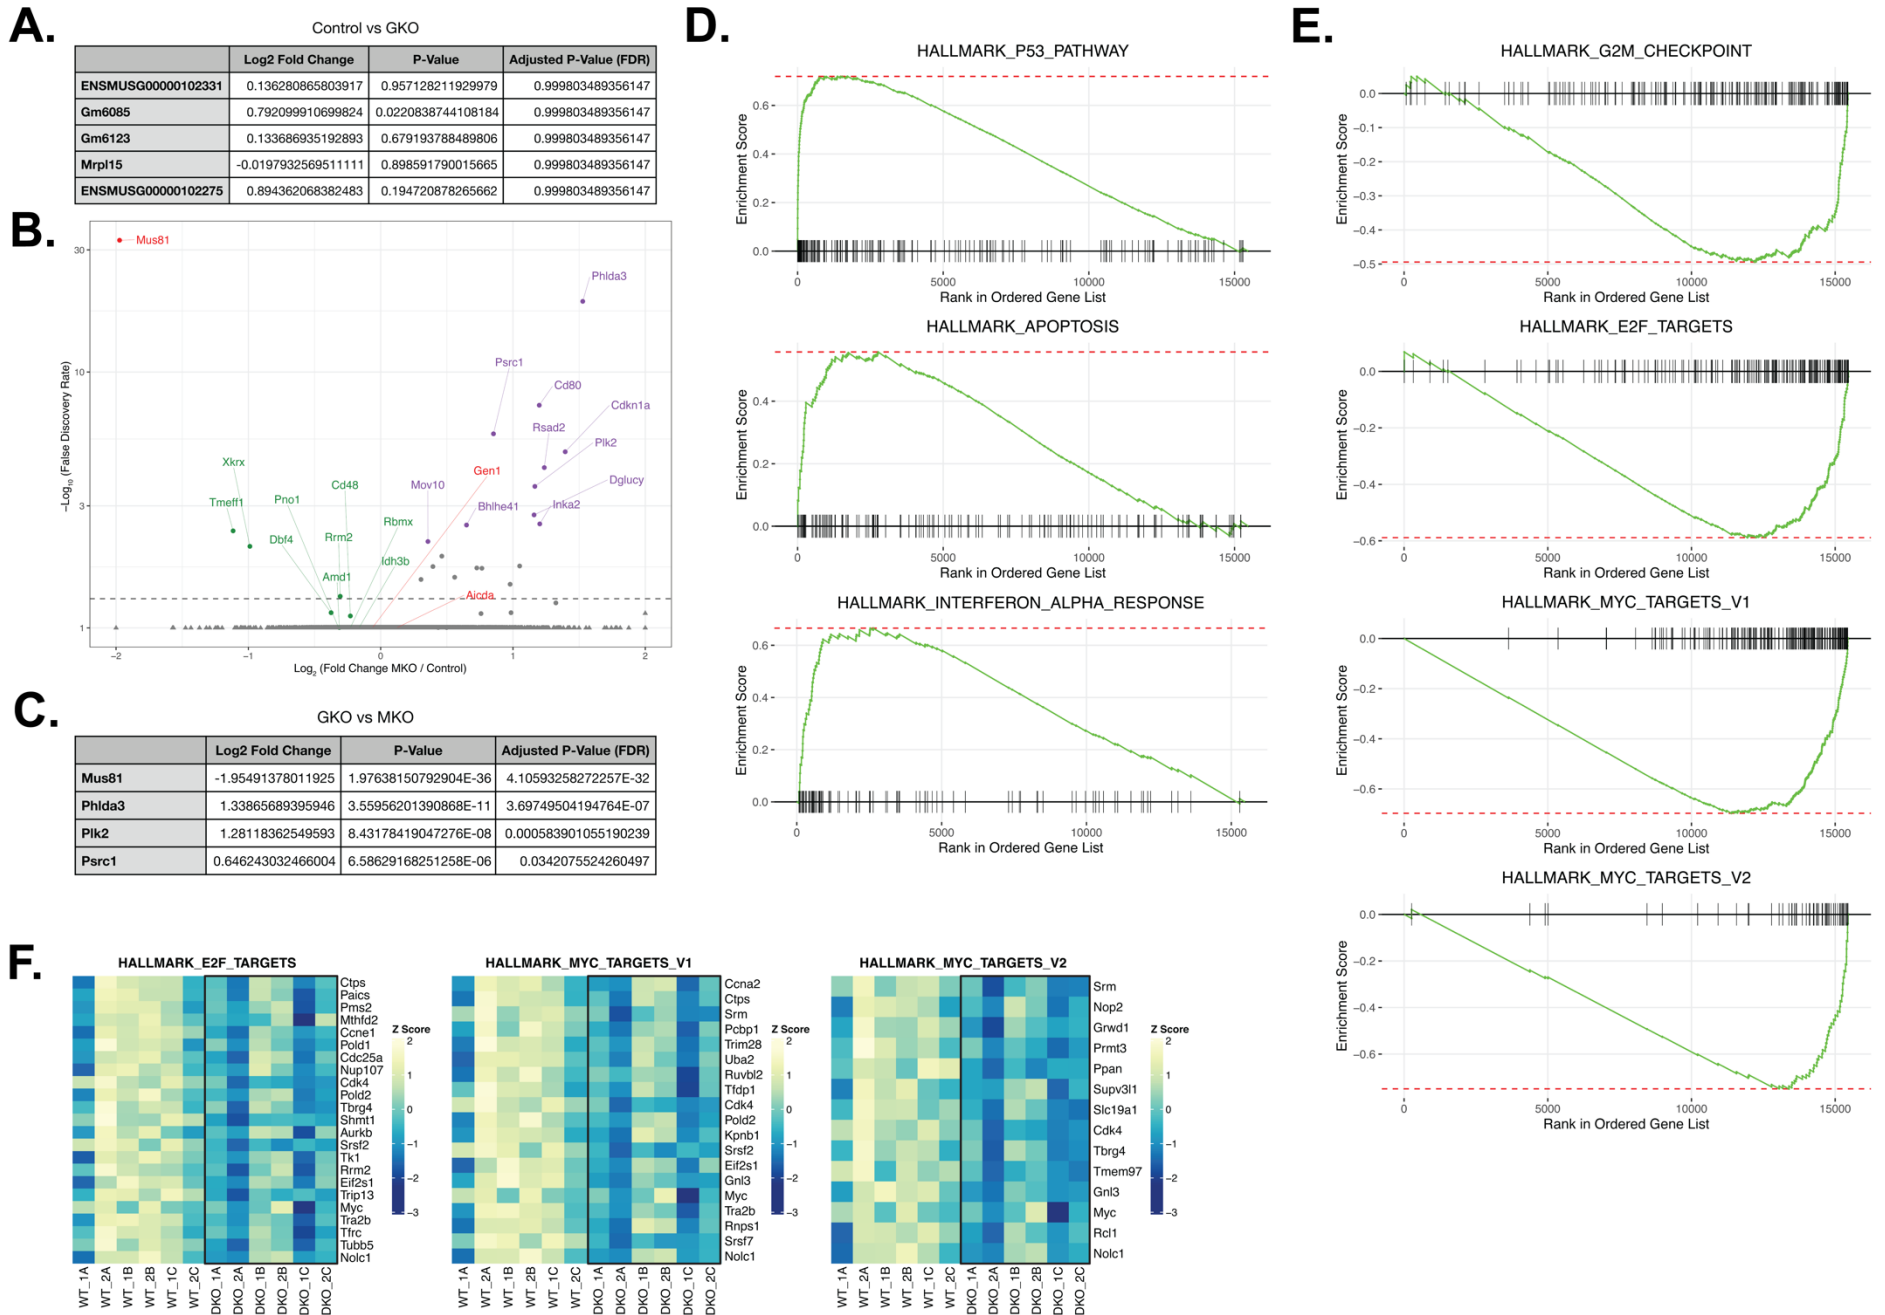

939 **Figure 4—figure supplement 1. Transcriptomics and GSEA analyses of ex vivo-**  
940 **activated control, GKO, and MKO B cells.** (A) Table listing the first five genes and the  
941 corresponding  $\log_2$  fold change, P-value, and FDR generated from the DESeq analysis  
942 comparing *Gen1*<sup>+/-</sup> *Mus81*<sup>fl/fl</sup> (control) and *Gen1*<sup>-/-</sup> *Mus81*<sup>fl/fl</sup> (GKO) B cells (B) Volcano plot  
943 displaying the differential gene expression between control and *Cd23-Cre Gen1*<sup>+/-</sup>  
944 *Mus81*<sup>fl/fl</sup> (MKO) cultures at 48 hours post-stimulation. Purple dots indicate the top 10  
945 significantly upregulated genes, and the green dots indicate genes that are de-enriched.  
946 (C) Table listing the genes that are differentially expressed between GKO and MKO B  
947 cells (D) GSEA plots of the Hallmark Gene Sets enriched in DKO cells. (E) GSEA plots  
948 of the Hallmark Gene Sets de-enriched in DKO cells. (F) Heatmap depicting the genes  
949 within the indicated Hallmark Gene Sets that had a  $\log_2$  fold change of  $\leq -0.3$  and FDR of  
950  $< 0.05$  in DKO cells relative to control. Data are from 6 mice per genotype. The labels '1'  
951 and '2' represent male and female mice, respectively, and 'A' to 'C' denote the three  
952 experimental ex vivo groups.
